# Supplementary material for: Diversity of 16S-23S rDNA Internal Transcribed Spacer (ITS) Reveals Phylogenetic Relationships in Burkholderia pseudomallei and Its Near-Neighbors
Source: PLoS One. 2011 Dec 14;6(12):e29323. doi: 10.1371/journal.pone.0029323 (PMC3237603; doi:10.1371/journal.pone.0029323)
Supplement: Table S1 — List of ITS sequences or whole-genome sources of ITS sequences used for bioinformatics analysis in this study. (XLS) [file pone.0029323.s001.xls]

## Sheet: Table S1
Table S1. List of ITS sequences or whole-genome sources of ITS sequences used for bioinformatic analysis in this study.
		Species	Strain Name	Alternate Strain Name(s)	ITS Type	Geographic Origin	Epidemiological Type	Sequence Source	GenBank Accession No.
		B.mallei	ATCC23344	2002721648, NCTC12938, GB8, Strain China 7	C	Burma	Human	Completed whole genome sequence	CP000010, CP000011
			NCTC10229	M2, 2002734299, GB5, Strain Budapest	C	Hungary	Unknown	Completed whole genome sequence; This study	CP000545, CP000546, FJ981719
			NCTC10247	2002734300, 2002734315, GB7, Strain 12	C	Turkey	Unknown	Completed whole genome sequence	CP000547, CP000548
			SAVP1		C	India	Clinical	Completed whole genome sequence	CP000525, CP000526
		B. pseudomallei	K96243		C	Thailand	Clinical	Completed whole genome sequence	BX571965, BX571966
			MSHR0305		CE	Australia	Clinical	Whole genome shotgun sequence	AAYX00000000
			1710b		CE	Thailand	Clinical	Completed whole genome sequence	CP000124, CP000125
			1106a		CE	Thailand	Clinical	Completed whole genome sequence	CP000572, CP000573
			MSHR0668		E	Australia	Clinical	Completed whole genome sequence	CP000570, CP000571
			MSHR1119		C	Australia	Environmental	This study	FJ981718
			Pasteur #6068	2002721763	C	Vietnam	Unknown	This study	FJ981716
			2661a	2744	C	Thailand	Clinical	This study	FJ981717
			MSHR1164		E	Australia	Clinical	This study	FJ981707
			E0361		E	Thailand	Environmental	This study	FJ981706
			MSHR0140		G	Australia	Clinical	This study	FJ981724
			MSHR2238		G	Australia	Clinical	This study	FJ981726
			MSHR1924		G	Australia	Clinical	This study	FJ981725
			2002721123	H0929, 98-33	G	Puerto Rico	Clinical	This study	FJ981723
			2002721628	25	G	Madagascar	Environmental	This study	FJ981722
			2002721629	31	G	Kenya	Environmental	This study	FJ981721
			Bp 99051902		G	Unknown	Clinical	This study	FJ981720
			MSHR1813		GE	Australia	Clinical	This study - E allele only	FJ981703
			E0387		CE	Thailand	Environmental	This study - C allele only	FJ981714
			MSHR0449		CE	Australia	Clinical	This study - Both alleles	FJ981705, FJ981715
			USAMRU Malaysia #12	2002721736	CE	Malaysia	Unknown	This study - Both alleles	FJ981704, FJ981713
		B. thailandensis	E264		A	Thailand	Environmental	Completed whole genome sequence	CP000085, CP000086
			E0122		A	Thailand	Environmental	This study	FJ981710
			E0154		A	Thailand	Environmental	This study	FJ981711
			Phuket 4 W-1	2002721701	A	Thailand	Environmental	This study	FJ981708
			USAMRU Malaysia #20	2002721744	A	Malaysia	Unknown	This study	FJ981709
		B. thailandensis-like	MSMB43		B	Australia	Environmental	Whole genome shotgun sequence	ABBM00000000
			MSHR1554		B	Australia	Environmental	This study	FJ981712
		B. oklahomensis	C6786		D	USA	Clinical	Whole genome shotgun sequence	ABBG00000000
