# Supplementary material for: Diversity of 16S-23S rDNA Internal Transcribed Spacer (ITS) Reveals Phylogenetic Relationships in Burkholderia pseudomallei and Its Near-Neighbors
Source: PLoS One. 2011 Dec 14;6(12):e29323. doi: 10.1371/journal.pone.0029323 (PMC3237603; doi:10.1371/journal.pone.0029323)
Supplement: Table S2 — All ITS typing data generated in this study, including isolate contributor, geographic origin, epidemiological data and MLST data, when known. (XLS) [file pone.0029323.s002.xls]

## Sheet:  Table S2
Table S2. All ITS typing data generated in this study, including isolate contributor, geographic origin, epidemiological data and MLST data, when known
Sample Name	Alternate Sample Name(s)	ITS Type	Species	Country	Epi Data	MLST	Source
Bcp_TG_01723		F	Burkholderia cepacia	Unknown	Environmental		Apichai Tuanyok, NAU, Arizona
Bcp_TG_06561_1		F	Burkholderia cepacia	Unknown	Environmental		Apichai Tuanyok, NAU, Arizona
NCTC10229	M2, 2002734299, GB5, Strain Budapest	C	Burkholderia mallei	Hungary	Unknown		Mindy Glass, CDC, Atlanta
ATCC23344	2002721648, NCTC12938, GB8, Strain China 7	C	Burkholderia mallei	Burma	Human		Mindy Glass, CDC, Atlanta
NCTC10247	2002734300, 2002734315, GB7, Strain 12	C	Burkholderia mallei	Turkey	Unknown		Mindy Glass, CDC, Atlanta
2002721280	KC1092, 52-236	C	Burkholderia mallei	Iran	Unknown		Mindy Glass, CDC, Atlanta
A188_Pasteur	2002721278, KC1090, 6317440, 278	C	Burkholderia mallei	Unknown	Unknown		Mindy Glass, CDC, Atlanta
A193_Pasteur	2002721279, KC1091, 279	C	Burkholderia mallei	Unknown	Animal		Mindy Glass, CDC, Atlanta
ATCC10399	M3, 2002721275, NCTC10245, KC236/China 5, GB11, 275	C	Burkholderia mallei	China	Animal		Mindy Glass, CDC, Atlanta
ATCC15310	2000031063, NCTC10230, GB12, Ivan	C	Burkholderia mallei	Hungary	Unknown		Mindy Glass, CDC, Atlanta
EY100	*EY100	C	Burkholderia mallei	Unknown	Horse		Vanaporn Wuthiekanun/Sharon Peacock, Bangkok, Thailand
EY2235		C	Burkholderia mallei	China	Horse		Vanaporn Wuthiekanun/Sharon Peacock, Bangkok, Thailand
EY2236		C	Burkholderia mallei	China	Horse		Vanaporn Wuthiekanun/Sharon Peacock, Bangkok, Thailand
EY2237		C	Burkholderia mallei	China	Horse		Vanaporn Wuthiekanun/Sharon Peacock, Bangkok, Thailand
EY2238		C	Burkholderia mallei	China	Unknown		Vanaporn Wuthiekanun/Sharon Peacock, Bangkok, Thailand
EY2239		C	Burkholderia mallei	China	Unknown		Vanaporn Wuthiekanun/Sharon Peacock, Bangkok, Thailand
GB15_1-2	2002734307	C	Burkholderia mallei	China	Animal		Mindy Glass, CDC, Atlanta
H1533	2000031304, 2000031281, 304	C	Burkholderia mallei	Lab acquired infection, USA	Human		Mindy Glass, CDC, Atlanta
India65-503	2000031066	C	Burkholderia mallei	India	Unknown		Mindy Glass, CDC, Atlanta
India86-567-2	2000031064	C	Burkholderia mallei	India	Animal		Mindy Glass, CDC, Atlanta
KC0248	2004037733	C	Burkholderia mallei	Unknown	Unknown		Mindy Glass, CDC, Atlanta
KC234	2002721273, 3783, 273	C	Burkholderia mallei	Burma	Human		Mindy Glass, CDC, Atlanta
KC235	2002721274, 274	C	Burkholderia mallei	Unknown	Unknown		Mindy Glass, CDC, Atlanta
KC237	2002721276, KC237, G-2(3), 276	C	Burkholderia mallei	Unknown	Unknown		Mindy Glass, CDC, Atlanta
KC238	2002721277, KC238, Kweiyang #4, 277	C	Burkholderia mallei	Unknown	Animal		Mindy Glass, CDC, Atlanta
NCTC10248	M4, 2002734304, GB4, Strain 6	C	Burkholderia mallei	Turkey	Human		Mindy Glass, CDC, Atlanta
NCTC10260	M5, 2002734301, GB6, Strain 11	C	Burkholderia mallei	Turkey	Human		Mindy Glass, CDC, Atlanta
NCTC120	2002734306, 2002734311, GB3, Strain A	C	Burkholderia mallei	United Kingdom	Unknown		Mindy Glass, CDC, Atlanta
NCTC3708	2002734305, 2002734316, GB9, Strain 102	C	Burkholderia mallei	India	Animal		Mindy Glass, CDC, Atlanta
NCTC3709	M1, 2002734303, NCTC03709, GB10, Strain 106	C	Burkholderia mallei	India	Animal		Mindy Glass, CDC, Atlanta
PRL1_ship2		C	Burkholderia mallei	Pakistan	Animal		Dr. Muhammad Saqib, Dr. Naureen Abeera; Pakistan
PRL11_ship2		C	Burkholderia mallei	Pakistan	Animal		Dr. Muhammad Saqib, Dr. Naureen Abeera; Pakistan
PRL13_ship2		C	Burkholderia mallei	Pakistan	Animal		Dr. Muhammad Saqib, Dr. Naureen Abeera; Pakistan
PRL19		C	Burkholderia mallei	Pakistan	Animal		David DeShazer, USAMRIID
PRL2		C	Burkholderia mallei	Pakistan	Unknown		Dr. Muhammad Saqib, Dr. Naureen Abeera; Pakistan
PRL20_ship1		C	Burkholderia mallei	Pakistan	Animal		David DeShazer, USAMRIID
PRL20_ship2		C	Burkholderia mallei	Pakistan	Animal		Dr. Muhammad Saqib, Dr. Naureen Abeera; Pakistan
PRL3		C	Burkholderia mallei	Pakistan	Unknown		Dr. Muhammad Saqib, Dr. Naureen Abeera; Pakistan
PRL33		C	Burkholderia mallei	Pakistan	Unknown		Dr. Muhammad Saqib, Dr. Naureen Abeera; Pakistan
PRL34		C	Burkholderia mallei	Pakistan	Unknown		Dr. Muhammad Saqib, Dr. Naureen Abeera; Pakistan
PRL4		C	Burkholderia mallei	Pakistan	Unknown		Dr. Muhammad Saqib, Dr. Naureen Abeera; Pakistan
PRL41		C	Burkholderia mallei	Pakistan	Unknown		Dr. Muhammad Saqib, Dr. Naureen Abeera; Pakistan
PRL42		C	Burkholderia mallei	Pakistan	Unknown		Dr. Muhammad Saqib, Dr. Naureen Abeera; Pakistan
PRL44		C	Burkholderia mallei	Pakistan	Unknown		Dr. Muhammad Saqib, Dr. Naureen Abeera; Pakistan
PRL45		C	Burkholderia mallei	Pakistan	Unknown		Dr. Muhammad Saqib, Dr. Naureen Abeera; Pakistan
PRL7_ship1		C	Burkholderia mallei	Pakistan	Animal		David DeShazer, USAMRIID
Turkey1	2000031065, #1 Turkey	C	Burkholderia mallei	Turkey	Unknown		Steven P. Harvey, Edgewood Chemical Biological Center
Turkey2	T2	C	Burkholderia mallei	Turkey	Unknown		Steven P. Harvey, Edgewood Chemical Biological Center
Turkey3		C	Burkholderia mallei	Unknown	Unknown		Steven P. Harvey, Edgewood Chemical Biological Center
C6786		D	Burkholderia oklahomensis	USA	Clinical		Mindy Glass, CDC, Atlanta
E0147		D	Burkholderia oklahomensis	USA	Clinical		Mindy Glass, CDC, Atlanta
C7532		D	Burkholderia oklahomensis	USA	Environmental		Mindy Glass, CDC, Atlanta
C7533		D	Burkholderia oklahomensis	USA	Environmental		Mindy Glass, CDC, Atlanta
MSHR0668		E	Burkholderia pseudomallei	Australia	Clinical	129	Bart J. Currie, Menzies School Health Research, Australia
MSHR0663		C	Burkholderia pseudomallei	Australia	Clinical	36	Bart J. Currie, Menzies School Health Research, Australia
MSHR0664		C	Burkholderia pseudomallei	Australia	Clinical	36	Bart J. Currie, Menzies School Health Research, Australia
MSHR0665		C	Burkholderia pseudomallei	Australia	Clinical	36	Bart J. Currie, Menzies School Health Research, Australia
MSHR0666		C	Burkholderia pseudomallei	Australia	Clinical	36	Bart J. Currie, Menzies School Health Research, Australia
MSHR0303		CE	Burkholderia pseudomallei	Australia	Clinical	36	Bart J. Currie, Menzies School Health Research, Australia
MSHR0684		CE	Burkholderia pseudomallei	Australia	Clinical	103	Bart J. Currie, Menzies School Health Research, Australia
MSHR0282		CE	Burkholderia pseudomallei	Australia	Clinical	105	Bart J. Currie, Menzies School Health Research, Australia
MSHR0064		E	Burkholderia pseudomallei	Australia	Clinical	109	Bart J. Currie, Menzies School Health Research, Australia
MSHR0219		E	Burkholderia pseudomallei	Australia	Environmental	109	Bart J. Currie, Menzies School Health Research, Australia
MSHR0640		E	Burkholderia pseudomallei	Australia	Clinical	109	Bart J. Currie, Menzies School Health Research, Australia
MSHR0719		E	Burkholderia pseudomallei	Australia	Clinical	109	Bart J. Currie, Menzies School Health Research, Australia
MSHR0114		C	Burkholderia pseudomallei	Australia	Clinical	121	Bart J. Currie, Menzies School Health Research, Australia
MSHR0286		CE	Burkholderia pseudomallei	Australia	Clinical	125	Bart J. Currie, Menzies School Health Research, Australia
MSHR0435		CE	Burkholderia pseudomallei	Australia	Clinical	126	Bart J. Currie, Menzies School Health Research, Australia
MSHR0634		E	Burkholderia pseudomallei	Australia	Clinical	128	Bart J. Currie, Menzies School Health Research, Australia
MSHR0726		C	Burkholderia pseudomallei	Australia	Clinical	130	Bart J. Currie, Menzies School Health Research, Australia
MSHR0207		C	Burkholderia pseudomallei	Australia	Animal	132	Bart J. Currie, Menzies School Health Research, Australia
MSHR0264		C	Burkholderia pseudomallei	Australia	Clinical	132	Bart J. Currie, Menzies School Health Research, Australia
MSHR0392a		C	Burkholderia pseudomallei	Australia	Clinical	132	Bart J. Currie, Menzies School Health Research, Australia
MSHR0465a		C	Burkholderia pseudomallei	Australia	Clinical	132	Bart J. Currie, Menzies School Health Research, Australia
MSHR0465j		C	Burkholderia pseudomallei	Australia	Clinical	132	Bart J. Currie, Menzies School Health Research, Australia
MSHR0501a		C	Burkholderia pseudomallei	Australia	Clinical	132	Bart J. Currie, Menzies School Health Research, Australia
MSHR0501b		C	Burkholderia pseudomallei	Australia	Clinical	132	Bart J. Currie, Menzies School Health Research, Australia
MSHR0652		C	Burkholderia pseudomallei	Australia	Clinical	132	Bart J. Currie, Menzies School Health Research, Australia
MSHR0130		E	Burkholderia pseudomallei	Australia	Clinical	134	Bart J. Currie, Menzies School Health Research, Australia
MSHR0073		E	Burkholderia pseudomallei	Australia	Clinical	135	Bart J. Currie, Menzies School Health Research, Australia
MSHR0099		E	Burkholderia pseudomallei	Australia	Clinical	135	Bart J. Currie, Menzies School Health Research, Australia
MSHR0615		CE	Burkholderia pseudomallei	Australia	Clinical	136	Bart J. Currie, Menzies School Health Research, Australia
MSHR0688		C	Burkholderia pseudomallei	Australia	Clinical	137	Bart J. Currie, Menzies School Health Research, Australia
MSHR0129		C	Burkholderia pseudomallei	Australia	Clinical	138	Bart J. Currie, Menzies School Health Research, Australia
MSHR0239		E	Burkholderia pseudomallei	Australia	Clinical	140	Bart J. Currie, Menzies School Health Research, Australia
MSHR0062		E	Burkholderia pseudomallei	Australia	Clinical	148	Bart J. Currie, Menzies School Health Research, Australia
MSHR0116		C	Burkholderia pseudomallei	Australia	Clinical	149	Bart J. Currie, Menzies School Health Research, Australia
MSHR0213		E	Burkholderia pseudomallei	Australia	Environmental	260	Bart J. Currie, Menzies School Health Research, Australia
MSHR0122		C	Burkholderia pseudomallei	Australia	Clinical	266	Bart J. Currie, Menzies School Health Research, Australia
MSHR0161		E	Burkholderia pseudomallei	Australia	Animal	284	Bart J. Currie, Menzies School Health Research, Australia
MSHR0169		E	Burkholderia pseudomallei	Australia	Environmental	284	Bart J. Currie, Menzies School Health Research, Australia
MSHR0628		C	Burkholderia pseudomallei	Australia	Clinical	327	Bart J. Currie, Menzies School Health Research, Australia
MSHR0151		E	Burkholderia pseudomallei	Australia	Animal	328	Bart J. Currie, Menzies School Health Research, Australia
MSHR0365		E	Burkholderia pseudomallei	Australia	Clinical	429	Bart J. Currie, Menzies School Health Research, Australia
MSHR0223		CE	Burkholderia pseudomallei	Australia	Clinical	452	Bart J. Currie, Menzies School Health Research, Australia
MSHR0240		CE	Burkholderia pseudomallei	Australia	Clinical	453	Bart J. Currie, Menzies School Health Research, Australia
MSHR0493		C	Burkholderia pseudomallei	Australia	Clinical	586	Bart J. Currie, Menzies School Health Research, Australia
MSHR0465b		C	Burkholderia pseudomallei	Australia	Clinical		Bart J. Currie, Menzies School Health Research, Australia
MSHR0465c		C	Burkholderia pseudomallei	Australia	Clinical		Bart J. Currie, Menzies School Health Research, Australia
MSHR0465d		C	Burkholderia pseudomallei	Australia	Clinical		Bart J. Currie, Menzies School Health Research, Australia
MSHR0465e		C	Burkholderia pseudomallei	Australia	Clinical		Bart J. Currie, Menzies School Health Research, Australia
MSHR0465f		C	Burkholderia pseudomallei	Australia	Clinical		Bart J. Currie, Menzies School Health Research, Australia
MSHR0465g		C	Burkholderia pseudomallei	Australia	Clinical		Bart J. Currie, Menzies School Health Research, Australia
MSHR0465h		C	Burkholderia pseudomallei	Australia	Clinical		Bart J. Currie, Menzies School Health Research, Australia
MSHR0465i		C	Burkholderia pseudomallei	Australia	Clinical		Bart J. Currie, Menzies School Health Research, Australia
MSHR0500a		C	Burkholderia pseudomallei	Australia	Clinical		Bart J. Currie, Menzies School Health Research, Australia
MSHR0531		C	Burkholderia pseudomallei	Australia	Clinical		Bart J. Currie, Menzies School Health Research, Australia
MSHR0536		C	Burkholderia pseudomallei	Australia	Clinical		Bart J. Currie, Menzies School Health Research, Australia
MSHR0246		CE	Burkholderia pseudomallei	Australia	Environmental		Bart J. Currie, Menzies School Health Research, Australia
MSHR0095		E	Burkholderia pseudomallei	Australia	Clinical		Bart J. Currie, Menzies School Health Research, Australia
MSHR0146		E	Burkholderia pseudomallei	Australia	Animal		Bart J. Currie, Menzies School Health Research, Australia
MSHR0147		E	Burkholderia pseudomallei	Australia	Animal		Bart J. Currie, Menzies School Health Research, Australia
MSHR0148		E	Burkholderia pseudomallei	Australia	Animal		Bart J. Currie, Menzies School Health Research, Australia
MSHR0160		E	Burkholderia pseudomallei	Australia	Animal		Bart J. Currie, Menzies School Health Research, Australia
MSHR0162		E	Burkholderia pseudomallei	Australia	Animal		Bart J. Currie, Menzies School Health Research, Australia
MSHR0163		E	Burkholderia pseudomallei	Australia	Animal		Bart J. Currie, Menzies School Health Research, Australia
MSHR0164		E	Burkholderia pseudomallei	Australia	Animal		Bart J. Currie, Menzies School Health Research, Australia
MSHR0167		E	Burkholderia pseudomallei	Australia	Animal		Bart J. Currie, Menzies School Health Research, Australia
MSHR0168		E	Burkholderia pseudomallei	Australia	Environmental		Bart J. Currie, Menzies School Health Research, Australia
MSHR0171		E	Burkholderia pseudomallei	Australia	Animal		Bart J. Currie, Menzies School Health Research, Australia
MSHR0172		E	Burkholderia pseudomallei	Australia	Animal		Bart J. Currie, Menzies School Health Research, Australia
MSHR0190		E	Burkholderia pseudomallei	Australia	Animal		Bart J. Currie, Menzies School Health Research, Australia
MSHR0191		E	Burkholderia pseudomallei	Australia	Animal		Bart J. Currie, Menzies School Health Research, Australia
MSHR0194		E	Burkholderia pseudomallei	Australia	Animal		Bart J. Currie, Menzies School Health Research, Australia
MSHR0199		E	Burkholderia pseudomallei	Australia	Animal		Bart J. Currie, Menzies School Health Research, Australia
MSHR0214		E	Burkholderia pseudomallei	Australia	Environmental		Bart J. Currie, Menzies School Health Research, Australia
MSHR0225		E	Burkholderia pseudomallei	Australia	Animal		Bart J. Currie, Menzies School Health Research, Australia
MSHR0227		E	Burkholderia pseudomallei	Australia	Environmental		Bart J. Currie, Menzies School Health Research, Australia
MSHR0230		E	Burkholderia pseudomallei	Australia	Environmental		Bart J. Currie, Menzies School Health Research, Australia
MSHR0244		E	Burkholderia pseudomallei	Australia	Environmental		Bart J. Currie, Menzies School Health Research, Australia
MSHR0283		E	Burkholderia pseudomallei	Australia	Animal		Bart J. Currie, Menzies School Health Research, Australia
MSHR0295		E	Burkholderia pseudomallei	Australia	Environmental		Bart J. Currie, Menzies School Health Research, Australia
MSHR0297		E	Burkholderia pseudomallei	Australia	Environmental		Bart J. Currie, Menzies School Health Research, Australia
MSHR0351		E	Burkholderia pseudomallei	Australia	Animal		Bart J. Currie, Menzies School Health Research, Australia
MSHR0367a		E	Burkholderia pseudomallei	Australia	Clinical		Bart J. Currie, Menzies School Health Research, Australia
MSHR0367b		E	Burkholderia pseudomallei	Australia	Clinical		Bart J. Currie, Menzies School Health Research, Australia
MSHR0402		E	Burkholderia pseudomallei	Australia	Animal		Bart J. Currie, Menzies School Health Research, Australia
MSHR0406		E	Burkholderia pseudomallei	Australia	Animal		Bart J. Currie, Menzies School Health Research, Australia
MSHR0408		E	Burkholderia pseudomallei	Australia	Animal		Bart J. Currie, Menzies School Health Research, Australia
MSHR0417b		E	Burkholderia pseudomallei	Australia	Animal		Bart J. Currie, Menzies School Health Research, Australia
MSHR0484		E	Burkholderia pseudomallei	Australia	Animal		Bart J. Currie, Menzies School Health Research, Australia
MSHR0606		E	Burkholderia pseudomallei	Australia	Animal		Bart J. Currie, Menzies School Health Research, Australia
MSHR0305		CE	Burkholderia pseudomallei	Australia	Clinical	36	Bart J. Currie, Menzies School Health Research, Australia
MSHR1164		E	Burkholderia pseudomallei	Australia	Clinical	116	Bart J. Currie, Menzies School Health Research, Australia
MSHR1119		C	Burkholderia pseudomallei	Australia	Environmental	123	Bart J. Currie, Menzies School Health Research, Australia
MSHR0921		C	Burkholderia pseudomallei	Australia	Clinical	36	Bart J. Currie, Menzies School Health Research, Australia
MSHR0867		CE	Burkholderia pseudomallei	Australia	Clinical	103	Bart J. Currie, Menzies School Health Research, Australia
MSHR1367		C	Burkholderia pseudomallei	Australia	Clinical	104	Bart J. Currie, Menzies School Health Research, Australia
MSHR1152		CE	Burkholderia pseudomallei	Australia	Clinical	108	Bart J. Currie, Menzies School Health Research, Australia
MSHR0786		E	Burkholderia pseudomallei	Australia	Clinical	109	Bart J. Currie, Menzies School Health Research, Australia
MSHR0888		E	Burkholderia pseudomallei	Australia	Clinical	109	Bart J. Currie, Menzies School Health Research, Australia
MSHR0910		E	Burkholderia pseudomallei	Australia	Clinical	109	Bart J. Currie, Menzies School Health Research, Australia
MSHR1050		E	Burkholderia pseudomallei	Australia	Clinical	109	Bart J. Currie, Menzies School Health Research, Australia
MSHR1051		E	Burkholderia pseudomallei	Australia	Clinical	109	Bart J. Currie, Menzies School Health Research, Australia
MSHR1105		E	Burkholderia pseudomallei	Australia	Animal	109	Bart J. Currie, Menzies School Health Research, Australia
MSHR1223		E	Burkholderia pseudomallei	Australia	Clinical	109	Bart J. Currie, Menzies School Health Research, Australia
MSHR1390		E	Burkholderia pseudomallei	Australia	Clinical	109	Bart J. Currie, Menzies School Health Research, Australia
MSHR1429		E	Burkholderia pseudomallei	Australia	Clinical	109	Bart J. Currie, Menzies School Health Research, Australia
MSHR1079		E	Burkholderia pseudomallei	Australia	Clinical	111	Bart J. Currie, Menzies School Health Research, Australia
MSHR1080		E	Burkholderia pseudomallei	Australia	Clinical	111	Bart J. Currie, Menzies School Health Research, Australia
MSHR0911		E	Burkholderia pseudomallei	Australia	Clinical	112	Bart J. Currie, Menzies School Health Research, Australia
MSHR0800		C	Burkholderia pseudomallei	Australia	Clinical	114	Bart J. Currie, Menzies School Health Research, Australia
MSHR0875		C	Burkholderia pseudomallei	Australia	Clinical	115	Bart J. Currie, Menzies School Health Research, Australia
MSHR1184		E	Burkholderia pseudomallei	Australia	Clinical	116	Bart J. Currie, Menzies School Health Research, Australia
MSHR1153		E	Burkholderia pseudomallei	Australia	Clinical	117	Bart J. Currie, Menzies School Health Research, Australia
MSHR0789		C	Burkholderia pseudomallei	Australia	Clinical	120	Bart J. Currie, Menzies School Health Research, Australia
MSHR1357		E	Burkholderia pseudomallei	Australia	Clinical	122	Bart J. Currie, Menzies School Health Research, Australia
MSHR1178		C	Burkholderia pseudomallei	Australia	Environmental	123	Bart J. Currie, Menzies School Health Research, Australia
MSHR1179		C	Burkholderia pseudomallei	Australia	Environmental	123	Bart J. Currie, Menzies School Health Research, Australia
MSHR1182		C	Burkholderia pseudomallei	Australia	Environmental	123	Bart J. Currie, Menzies School Health Research, Australia
MSHR0944		C	Burkholderia pseudomallei	Australia	Clinical	127	Bart J. Currie, Menzies School Health Research, Australia
MSHR1043		C	Burkholderia pseudomallei	Australia	Clinical	131	Bart J. Currie, Menzies School Health Research, Australia
MSHR1048		C	Burkholderia pseudomallei	Australia	Clinical	131	Bart J. Currie, Menzies School Health Research, Australia
MSHR1288		C	Burkholderia pseudomallei	Australia	Clinical	131	Bart J. Currie, Menzies School Health Research, Australia
MSHR1418		C	Burkholderia pseudomallei	Australia	Clinical	131	Bart J. Currie, Menzies School Health Research, Australia
MSHR1459		C	Burkholderia pseudomallei	Australia	Clinical	131	Bart J. Currie, Menzies School Health Research, Australia
MSHR1660		C	Burkholderia pseudomallei	Australia	Clinical	131	Bart J. Currie, Menzies School Health Research, Australia
MSHR1662		C	Burkholderia pseudomallei	Australia	Clinical	131	Bart J. Currie, Menzies School Health Research, Australia
MSHR0767		C	Burkholderia pseudomallei	Australia	Clinical	132	Bart J. Currie, Menzies School Health Research, Australia
MSHR1031		C	Burkholderia pseudomallei	Australia	Clinical	132	Bart J. Currie, Menzies School Health Research, Australia
MSHR1099		C	Burkholderia pseudomallei	Australia	Clinical	132	Bart J. Currie, Menzies School Health Research, Australia
MSHR1128		C	Burkholderia pseudomallei	Australia	Animal	132	Bart J. Currie, Menzies School Health Research, Australia
MSHR1391		CE	Burkholderia pseudomallei	Australia	Clinical	139	Bart J. Currie, Menzies School Health Research, Australia
MSHR1123		C	Burkholderia pseudomallei	Australia	Clinical	143	Bart J. Currie, Menzies School Health Research, Australia
MSHR1168		C	Burkholderia pseudomallei	Australia	Clinical	144	Bart J. Currie, Menzies School Health Research, Australia
MSHR1161		E	Burkholderia pseudomallei	Australia	Clinical	146	Bart J. Currie, Menzies School Health Research, Australia
MSHR1174		E	Burkholderia pseudomallei	Australia	Clinical	147	Bart J. Currie, Menzies School Health Research, Australia
MSHR1300		C	Burkholderia pseudomallei	Australia	Clinical	333	Bart J. Currie, Menzies School Health Research, Australia
MSHR1378		C	Burkholderia pseudomallei	Australia	Clinical	466	Bart J. Currie, Menzies School Health Research, Australia
MSHR1281		CE	Burkholderia pseudomallei	Australia	Clinical	473	Bart J. Currie, Menzies School Health Research, Australia
MSHR0864		C	Burkholderia pseudomallei	Australia	Animal		Bart J. Currie, Menzies School Health Research, Australia
MSHR0896		C	Burkholderia pseudomallei	Australia	Clinical		Bart J. Currie, Menzies School Health Research, Australia
MSHR0937		C	Burkholderia pseudomallei	Australia	Clinical		Bart J. Currie, Menzies School Health Research, Australia
MSHR0952		C	Burkholderia pseudomallei	Australia	Clinical		Bart J. Currie, Menzies School Health Research, Australia
MSHR1047		C	Burkholderia pseudomallei	Australia	Clinical		Bart J. Currie, Menzies School Health Research, Australia
MSHR1177		C	Burkholderia pseudomallei	Australia	Environmental		Bart J. Currie, Menzies School Health Research, Australia
MSHR1180		C	Burkholderia pseudomallei	Australia	Environmental		Bart J. Currie, Menzies School Health Research, Australia
MSHR1181		C	Burkholderia pseudomallei	Australia	Environmental		Bart J. Currie, Menzies School Health Research, Australia
MSHR1183		C	Burkholderia pseudomallei	Australia	Environmental		Bart J. Currie, Menzies School Health Research, Australia
MSHR1290		C	Burkholderia pseudomallei	Australia	Clinical		Bart J. Currie, Menzies School Health Research, Australia
MSHR1627		C	Burkholderia pseudomallei	Australia	Clinical		Bart J. Currie, Menzies School Health Research, Australia
MSHR1628		C	Burkholderia pseudomallei	Australia	Clinical		Bart J. Currie, Menzies School Health Research, Australia
MSHR1629		C	Burkholderia pseudomallei	Australia	Clinical		Bart J. Currie, Menzies School Health Research, Australia
MSHR1630		C	Burkholderia pseudomallei	Australia	Clinical		Bart J. Currie, Menzies School Health Research, Australia
MSHR1655		C	Burkholderia pseudomallei	Australia	Clinical		Bart J. Currie, Menzies School Health Research, Australia
MSHR1668		C	Burkholderia pseudomallei	Australia	Clinical		Bart J. Currie, Menzies School Health Research, Australia
MSHR1675		C	Burkholderia pseudomallei	Australia	Clinical		Bart J. Currie, Menzies School Health Research, Australia
MSHR1710		C	Burkholderia pseudomallei	Australia	Clinical		Bart J. Currie, Menzies School Health Research, Australia
MSHR1713		C	Burkholderia pseudomallei	Australia	Clinical		Bart J. Currie, Menzies School Health Research, Australia
MSHR1286		CE	Burkholderia pseudomallei	Australia	Clinical		Bart J. Currie, Menzies School Health Research, Australia
MSHR0795		E	Burkholderia pseudomallei	Australia	Clinical		Bart J. Currie, Menzies School Health Research, Australia
MSHR0869		E	Burkholderia pseudomallei	Australia	Clinical		Bart J. Currie, Menzies School Health Research, Australia
MSHR1068		E	Burkholderia pseudomallei	Australia	Clinical		Bart J. Currie, Menzies School Health Research, Australia
MSHR1111		E	Burkholderia pseudomallei	Australia	Animal		Bart J. Currie, Menzies School Health Research, Australia
MSHR1203		E	Burkholderia pseudomallei	Australia	Clinical		Bart J. Currie, Menzies School Health Research, Australia
MSHR1034		E	Burkholderia pseudomallei	Australia	Clinical		Bart J. Currie, Menzies School Health Research, Australia
MSHR0140		G	Burkholderia pseudomallei	Australia	Clinical	280	Bart J. Currie, Menzies School Health Research, Australia
MSHR0449		CE	Burkholderia pseudomallei	Australia	Clinical	126	Bart J. Currie, Menzies School Health Research, Australia
MSHR0332		C	Burkholderia pseudomallei	Australia	Clinical	106	Bart J. Currie, Menzies School Health Research, Australia
MSHR0559		E	Burkholderia pseudomallei	Australia	Clinical	109	Bart J. Currie, Menzies School Health Research, Australia
MSHR0502		CE	Burkholderia pseudomallei	Australia	Environmental	114	Bart J. Currie, Menzies School Health Research, Australia
MSHR1460		E	Burkholderia pseudomallei	Australia	Clinical	122	Bart J. Currie, Menzies School Health Research, Australia
MSHR0343		CE	Burkholderia pseudomallei	Australia	Clinical	125	Bart J. Currie, Menzies School Health Research, Australia
MSHR0491		CE	Burkholderia pseudomallei	Australia	Environmental	126	Bart J. Currie, Menzies School Health Research, Australia
MSHR0455		C	Burkholderia pseudomallei	Australia	Animal	131	Bart J. Currie, Menzies School Health Research, Australia
MSHR0480		C	Burkholderia pseudomallei	Australia	Animal	132	Bart J. Currie, Menzies School Health Research, Australia
MSHR0614		C	Burkholderia pseudomallei	Australia	Clinical	132	Bart J. Currie, Menzies School Health Research, Australia
MSHR0362		E	Burkholderia pseudomallei	Australia	clinical	141	Bart J. Currie, Menzies School Health Research, Australia
MSHR0272		E	Burkholderia pseudomallei	Australia	Clinical	236	Bart J. Currie, Menzies School Health Research, Australia
MSHR1561		C	Burkholderia pseudomallei	Australia	Clinical	237	Bart J. Currie, Menzies School Health Research, Australia
MSHR0210		E	Burkholderia pseudomallei	Australia	Clinical	238	Bart J. Currie, Menzies School Health Research, Australia
MSHR1579		E	Burkholderia pseudomallei	Australia	Clinical	239	Bart J. Currie, Menzies School Health Research, Australia
MSHR0338		E	Burkholderia pseudomallei	Australia	Clinical	243	Bart J. Currie, Menzies School Health Research, Australia
MSHR0139		E	Burkholderia pseudomallei	Australia	Clinical	246	Bart J. Currie, Menzies School Health Research, Australia
MSHR1319		C	Burkholderia pseudomallei	Australia	Clinical	249	Bart J. Currie, Menzies School Health Research, Australia
MSHR1560		E	Burkholderia pseudomallei	Australia	Clinical	251	Bart J. Currie, Menzies School Health Research, Australia
MSHR1457		CE	Burkholderia pseudomallei	Australia	Clinical	255	Bart J. Currie, Menzies School Health Research, Australia
MSHR1557		E	Burkholderia pseudomallei	Australia	Clinical	256	Bart J. Currie, Menzies School Health Research, Australia
MSHR0840		E	Burkholderia pseudomallei	Australia	Clinical	257	Bart J. Currie, Menzies School Health Research, Australia
MSHR1559		E	Burkholderia pseudomallei	Australia	Clinical	258	Bart J. Currie, Menzies School Health Research, Australia
MSHR1224		E	Burkholderia pseudomallei	Australia	Clinical	259	Bart J. Currie, Menzies School Health Research, Australia
MSHR1581		C	Burkholderia pseudomallei	Australia	Clinical	261	Bart J. Currie, Menzies School Health Research, Australia
MSHR1200		E	Burkholderia pseudomallei	Australia	Clinical	262	Bart J. Currie, Menzies School Health Research, Australia
MSHR0450		E	Burkholderia pseudomallei	Australia	Clinical	263	Bart J. Currie, Menzies School Health Research, Australia
MSHR1558		E	Burkholderia pseudomallei	Australia	Clinical	265	Bart J. Currie, Menzies School Health Research, Australia
MSHR0504		C	Burkholderia pseudomallei	Australia	Environmental	268	Bart J. Currie, Menzies School Health Research, Australia
MSHR1202		CE	Burkholderia pseudomallei	Australia	Clinical	269	Bart J. Currie, Menzies School Health Research, Australia
MSHR1582		E	Burkholderia pseudomallei	Australia	Clinical	270	Bart J. Currie, Menzies School Health Research, Australia
MSHR0141		E	Burkholderia pseudomallei	Australia	Clinical	274	Bart J. Currie, Menzies School Health Research, Australia
MSHR0692		CE	Burkholderia pseudomallei	Australia	Clinical	275	Bart J. Currie, Menzies School Health Research, Australia
MSHR1098		CE	Burkholderia pseudomallei	Australia	Clinical	279	Bart J. Currie, Menzies School Health Research, Australia
MSHR0508		C	Burkholderia pseudomallei	Australia	Environmental	281	Bart J. Currie, Menzies School Health Research, Australia
MSHR1831		C	Burkholderia pseudomallei	Australia	Animal	285	Bart J. Currie, Menzies School Health Research, Australia
MSHR0543		E	Burkholderia pseudomallei	Australia	Clinical	294	Bart J. Currie, Menzies School Health Research, Australia
MSHR1118		E	Burkholderia pseudomallei	Australia	Environmental	325	Bart J. Currie, Menzies School Health Research, Australia
MSHR0473		C	Burkholderia pseudomallei	Australia	Animal	333	Bart J. Currie, Menzies School Health Research, Australia
MSHR1839		G	Burkholderia pseudomallei	Australia	Environmental	336	Bart J. Currie, Menzies School Health Research, Australia
MSHR2054		E	Burkholderia pseudomallei	Australia	Clinical	341	Bart J. Currie, Menzies School Health Research, Australia
MSHR0221		CE	Burkholderia pseudomallei	Australia	Clinical	428	Bart J. Currie, Menzies School Health Research, Australia
MSHR0373		CE	Burkholderia pseudomallei	Australia	Clinical	430	Bart J. Currie, Menzies School Health Research, Australia
MSHR1042		E	Burkholderia pseudomallei	Australia	Clinical	435	Bart J. Currie, Menzies School Health Research, Australia
MSHR1790		E	Burkholderia pseudomallei	Australia	Clinical	439	Bart J. Currie, Menzies School Health Research, Australia
MSHR2151		E	Burkholderia pseudomallei	Australia	Clinical	442	Bart J. Currie, Menzies School Health Research, Australia
MSHR2178		E	Burkholderia pseudomallei	Australia	Clinical	449	Bart J. Currie, Menzies School Health Research, Australia
MSHR2265		E	Burkholderia pseudomallei	Australia	Clinical	514	Bart J. Currie, Menzies School Health Research, Australia
MSHR1199		C	Burkholderia pseudomallei	Australia	Clinical	556	Bart J. Currie, Menzies School Health Research, Australia
MSHR0414		C	Burkholderia pseudomallei	Australia	Animal	616	Bart J. Currie, Menzies School Health Research, Australia
MSHR1534		C	Burkholderia pseudomallei	Australia	Clinical	36	Bart J. Currie, Menzies School Health Research, Australia
MSHR0420		CE	Burkholderia pseudomallei	Australia	Clinical	36	Bart J. Currie, Menzies School Health Research, Australia
MSHR0460		CE	Burkholderia pseudomallei	Australia	Clinical	36	Bart J. Currie, Menzies School Health Research, Australia
MSHR1423		CE	Burkholderia pseudomallei	Australia	Clinical	36	Bart J. Currie, Menzies School Health Research, Australia
MSHR0281		E	Burkholderia pseudomallei	Australia	Clinical	109	Bart J. Currie, Menzies School Health Research, Australia
MSHR0388		E	Burkholderia pseudomallei	Australia	Clinical	109	Bart J. Currie, Menzies School Health Research, Australia
MSHR0517		E	Burkholderia pseudomallei	Australia	Clinical	109	Bart J. Currie, Menzies School Health Research, Australia
MSHR0537		E	Burkholderia pseudomallei	Australia	Clinical	109	Bart J. Currie, Menzies School Health Research, Australia
MSHR0585		E	Burkholderia pseudomallei	Australia	Clinical	109	Bart J. Currie, Menzies School Health Research, Australia
MSHR0980		E	Burkholderia pseudomallei	Australia	Clinical	109	Bart J. Currie, Menzies School Health Research, Australia
MSHR1361		E	Burkholderia pseudomallei	Australia	Clinical	109	Bart J. Currie, Menzies School Health Research, Australia
MSHR1530		E	Burkholderia pseudomallei	Australia	Clinical	109	Bart J. Currie, Menzies School Health Research, Australia
MSHR0492A		C	Burkholderia pseudomallei	Australia	Clinical	114	Bart J. Currie, Menzies School Health Research, Australia
MSHR0532		C	Burkholderia pseudomallei	Australia	Clinical	115	Bart J. Currie, Menzies School Health Research, Australia
MSHR0872		C	Burkholderia pseudomallei	Australia	Clinical	115	Bart J. Currie, Menzies School Health Research, Australia
MSHR1317		CE	Burkholderia pseudomallei	Australia	Clinical	116	Bart J. Currie, Menzies School Health Research, Australia
MSHR0261		E	Burkholderia pseudomallei	Australia	Clinical	116	Bart J. Currie, Menzies School Health Research, Australia
MSHR0462A		CE	Burkholderia pseudomallei	Australia	Clinical	126	Bart J. Currie, Menzies School Health Research, Australia
MSHR0551		C	Burkholderia pseudomallei	Australia	Clinical	132	Bart J. Currie, Menzies School Health Research, Australia
MSHR0812		C	Burkholderia pseudomallei	Australia	Clinical	132	Bart J. Currie, Menzies School Health Research, Australia
MSHR0425A		C	Burkholderia pseudomallei	Australia	Clinical	144	Bart J. Currie, Menzies School Health Research, Australia
MSHR0127		E	Burkholderia pseudomallei	Australia	Clinical	149	Bart J. Currie, Menzies School Health Research, Australia
MSHR0220		C	Burkholderia pseudomallei	Australia	Clinical	179	Bart J. Currie, Menzies School Health Research, Australia
MSHR0252		CE	Burkholderia pseudomallei	Australia	Clinical	255	Bart J. Currie, Menzies School Health Research, Australia
MSHR0669		CE	Burkholderia pseudomallei	Australia	Clinical	259	Bart J. Currie, Menzies School Health Research, Australia
MSHR0120		E	Burkholderia pseudomallei	Australia	Clinical	259	Bart J. Currie, Menzies School Health Research, Australia
MSHR0643		E	Burkholderia pseudomallei	Australia	Clinical	259	Bart J. Currie, Menzies School Health Research, Australia
MSHR0477A		E	Burkholderia pseudomallei	Australia	Clinical	262	Bart J. Currie, Menzies School Health Research, Australia
MSHR1058		C	Burkholderia pseudomallei	Australia	Clinical	266	Bart J. Currie, Menzies School Health Research, Australia
MSHR1504		C	Burkholderia pseudomallei	Australia	Clinical	326	Bart J. Currie, Menzies School Health Research, Australia
MSHR1044		C	Burkholderia pseudomallei	Australia	Clinical	327	Bart J. Currie, Menzies School Health Research, Australia
MSHR0091		E	Burkholderia pseudomallei	Australia	Clinical	331	Bart J. Currie, Menzies School Health Research, Australia
MSHR0088A		E	Burkholderia pseudomallei	Australia	Clinical	335	Bart J. Currie, Menzies School Health Research, Australia
MSHR1564		E	Burkholderia pseudomallei	Australia	Clinical	429	Bart J. Currie, Menzies School Health Research, Australia
MSHR1462		E	Burkholderia pseudomallei	Australia	Clinical	434	Bart J. Currie, Menzies School Health Research, Australia
MSHR0348		CE	Burkholderia pseudomallei	Australia	Clinical	460	Bart J. Currie, Menzies School Health Research, Australia
MSHR0544		E	Burkholderia pseudomallei	Australia	Clinical	467	Bart J. Currie, Menzies School Health Research, Australia
MSHR0682		CE	Burkholderia pseudomallei	Australia	Clinical	469	Bart J. Currie, Menzies School Health Research, Australia
MSHR0817		E	Burkholderia pseudomallei	Australia	Clinical	470	Bart J. Currie, Menzies School Health Research, Australia
MSHR0355		C	Burkholderia pseudomallei	Australia	Clinical	483	Bart J. Currie, Menzies School Health Research, Australia
MSHR1569		C	Burkholderia pseudomallei	Australia	Clinical	553	Bart J. Currie, Menzies School Health Research, Australia
MSHR0401		E	Burkholderia pseudomallei	Australia	Clinical	563	Bart J. Currie, Menzies School Health Research, Australia
MSHR1566		E	Burkholderia pseudomallei	Australia	Clinical	566	Bart J. Currie, Menzies School Health Research, Australia
MSHR1354		E	Burkholderia pseudomallei	Australia	Clinical	580	Bart J. Currie, Menzies School Health Research, Australia
MSHR0056		CE	Burkholderia pseudomallei	Australia	Clinical	643	Bart J. Currie, Menzies School Health Research, Australia
MSHR0540		E	Burkholderia pseudomallei	Australia	Clinical	678	Bart J. Currie, Menzies School Health Research, Australia
MSHR0259		E	Burkholderia pseudomallei	Australia	Clinical	680	Bart J. Currie, Menzies School Health Research, Australia
MSHR0498		E	Burkholderia pseudomallei	Australia	Clinical	682	Bart J. Currie, Menzies School Health Research, Australia
MSHR0868		C	Burkholderia pseudomallei	Australia	Clinical		Bart J. Currie, Menzies School Health Research, Australia
MSHR0121		CE	Burkholderia pseudomallei	Australia	Clinical		Bart J. Currie, Menzies School Health Research, Australia
MSHR1081		CE	Burkholderia pseudomallei	Australia	Clinical		Bart J. Currie, Menzies School Health Research, Australia
MSHR1392		CE	Burkholderia pseudomallei	Australia	Clinical		Bart J. Currie, Menzies School Health Research, Australia
MSHR0123		E	Burkholderia pseudomallei	Australia	Clinical		Bart J. Currie, Menzies School Health Research, Australia
MSHR0290		E	Burkholderia pseudomallei	Australia	Clinical		Bart J. Currie, Menzies School Health Research, Australia
MSHR0419		E	Burkholderia pseudomallei	Australia	Clinical		Bart J. Currie, Menzies School Health Research, Australia
MSHR0639		E	Burkholderia pseudomallei	Australia	Clinical		Bart J. Currie, Menzies School Health Research, Australia
MSHR0641		E	Burkholderia pseudomallei	Australia	Clinical		Bart J. Currie, Menzies School Health Research, Australia
MSHR0672		E	Burkholderia pseudomallei	Australia	Clinical		Bart J. Currie, Menzies School Health Research, Australia
MSHR0737		E	Burkholderia pseudomallei	Australia	Clinical		Bart J. Currie, Menzies School Health Research, Australia
MSHR0822		E	Burkholderia pseudomallei	Australia	Clinical		Bart J. Currie, Menzies School Health Research, Australia
MSHR0836		E	Burkholderia pseudomallei	Australia	Clinical		Bart J. Currie, Menzies School Health Research, Australia
MSHR0859		C	Burkholderia pseudomallei	Australia	Clinical		Bart J. Currie, Menzies School Health Research, Australia
MSHR0891		C	Burkholderia pseudomallei	Australia	Clinical		Bart J. Currie, Menzies School Health Research, Australia
MSHR0133		CE	Burkholderia pseudomallei	Australia	Clinical		Bart J. Currie, Menzies School Health Research, Australia
MSHR0549		CE	Burkholderia pseudomallei	Australia	Clinical		Bart J. Currie, Menzies School Health Research, Australia
MSHR0841		CE	Burkholderia pseudomallei	Australia	Clinical		Bart J. Currie, Menzies School Health Research, Australia
MSHR0940		CE	Burkholderia pseudomallei	Australia	Clinical		Bart J. Currie, Menzies School Health Research, Australia
MSHR0111		E	Burkholderia pseudomallei	Australia	Clinical		Bart J. Currie, Menzies School Health Research, Australia
MSHR0174		E	Burkholderia pseudomallei	Australia	Clinical		Bart J. Currie, Menzies School Health Research, Australia
MSHR0291		E	Burkholderia pseudomallei	Australia	Clinical		Bart J. Currie, Menzies School Health Research, Australia
MSHR0306		E	Burkholderia pseudomallei	Australia	Clinical		Bart J. Currie, Menzies School Health Research, Australia
MSHR0359		E	Burkholderia pseudomallei	Australia	Clinical		Bart J. Currie, Menzies School Health Research, Australia
MSHR0404		E	Burkholderia pseudomallei	Australia	Clinical		Bart J. Currie, Menzies School Health Research, Australia
MSHR0428		E	Burkholderia pseudomallei	Australia	Clinical		Bart J. Currie, Menzies School Health Research, Australia
MSHR0523		E	Burkholderia pseudomallei	Australia	Clinical		Bart J. Currie, Menzies School Health Research, Australia
MSHR0555		E	Burkholderia pseudomallei	Australia	Clinical		Bart J. Currie, Menzies School Health Research, Australia
MSHR0599		E	Burkholderia pseudomallei	Australia	Clinical		Bart J. Currie, Menzies School Health Research, Australia
MSHR0624		E	Burkholderia pseudomallei	Australia	Clinical		Bart J. Currie, Menzies School Health Research, Australia
MSHR0625		E	Burkholderia pseudomallei	Australia	Clinical		Bart J. Currie, Menzies School Health Research, Australia
MSHR0626		E	Burkholderia pseudomallei	Australia	Clinical		Bart J. Currie, Menzies School Health Research, Australia
MSHR0938		E	Burkholderia pseudomallei	Australia	Clinical		Bart J. Currie, Menzies School Health Research, Australia
MSHR1062		E	Burkholderia pseudomallei	Australia	Clinical		Bart J. Currie, Menzies School Health Research, Australia
MSHR1069		E	Burkholderia pseudomallei	Australia	Clinical		Bart J. Currie, Menzies School Health Research, Australia
MSHR1465		E	Burkholderia pseudomallei	Australia	Clinical		Bart J. Currie, Menzies School Health Research, Australia
MSHR0433A		CE	Burkholderia pseudomallei	Australia	Clinical		Bart J. Currie, Menzies School Health Research, Australia
MSHR2238		G	Burkholderia pseudomallei	Australia	Clinical		Bart J. Currie, Menzies School Health Research, Australia
MSHR1813		GE	Burkholderia pseudomallei	Australia	Clinical		Bart J. Currie, Menzies School Health Research, Australia
MSHR2936		CE	Burkholderia pseudomallei	Australia	Clinical	36	Bart J. Currie, Menzies School Health Research, Australia
MSHR2141		C	Burkholderia pseudomallei	Australia	Clinical	105	Bart J. Currie, Menzies School Health Research, Australia
MSHR2174		C	Burkholderia pseudomallei	Australia	Clinical	109	Bart J. Currie, Menzies School Health Research, Australia
MSHR1825		CE	Burkholderia pseudomallei	Australia	Clinical	109	Bart J. Currie, Menzies School Health Research, Australia
MSHR0257		E	Burkholderia pseudomallei	Australia	Animal	109	Bart J. Currie, Menzies School Health Research, Australia
MSHR0571		E	Burkholderia pseudomallei	Australia	Animal	109	Bart J. Currie, Menzies School Health Research, Australia
MSHR1764		E	Burkholderia pseudomallei	Australia	Clinical	109	Bart J. Currie, Menzies School Health Research, Australia
MSHR2077		E	Burkholderia pseudomallei	Australia	Clinical	109	Bart J. Currie, Menzies School Health Research, Australia
MSHR2432		E	Burkholderia pseudomallei	Australia	Clinical	109	Bart J. Currie, Menzies School Health Research, Australia
MSHR2633		E	Burkholderia pseudomallei	Australia	Clinical	109	Bart J. Currie, Menzies School Health Research, Australia
MSHR2967		E	Burkholderia pseudomallei	Australia	Animal	109	Bart J. Currie, Menzies School Health Research, Australia
MSHR2994		E	Burkholderia pseudomallei	Australia	Clinical	109	Bart J. Currie, Menzies School Health Research, Australia
MSHR3008		E	Burkholderia pseudomallei	Australia	Clinical	109	Bart J. Currie, Menzies School Health Research, Australia
MSHR0456		E	Burkholderia pseudomallei	Australia	Clinical	113	Bart J. Currie, Menzies School Health Research, Australia
MSHR2348		C	Burkholderia pseudomallei	Australia	Clinical	118	Bart J. Currie, Menzies School Health Research, Australia
MSHR0287		CE	Burkholderia pseudomallei	Australia	Clinical	125	Bart J. Currie, Menzies School Health Research, Australia
MSHR2872		C	Burkholderia pseudomallei	Australia	Clinical	131	Bart J. Currie, Menzies School Health Research, Australia
MSHR0983		C	Burkholderia pseudomallei	Australia	Clinical	142	Bart J. Currie, Menzies School Health Research, Australia
MSHR0356		C	Burkholderia pseudomallei	Australia	Clinical	149	Bart J. Currie, Menzies School Health Research, Australia
MSHR1897		C	Burkholderia pseudomallei	Australia	Clinical	245	Bart J. Currie, Menzies School Health Research, Australia
MSHR2232		C	Burkholderia pseudomallei	Australia	Clinical	266	Bart J. Currie, Menzies School Health Research, Australia
MSHR2251		C	Burkholderia pseudomallei	Australia	Clinical	266	Bart J. Currie, Menzies School Health Research, Australia
MSHR2974		CE	Burkholderia pseudomallei	Australia	Clinical	275	Bart J. Currie, Menzies School Health Research, Australia
MSHR1942		E	Burkholderia pseudomallei	Australia	Clinical	325	Bart J. Currie, Menzies School Health Research, Australia
MSHR2983		C	Burkholderia pseudomallei	Australia	Clinical	327	Bart J. Currie, Menzies School Health Research, Australia
MSHR1639		CE	Burkholderia pseudomallei	Australia	Environmental	331	Bart J. Currie, Menzies School Health Research, Australia
MSHR1879		C	Burkholderia pseudomallei	Australia	Clinical	332	Bart J. Currie, Menzies School Health Research, Australia
MSHR2867		C	Burkholderia pseudomallei	Australia	Clinical	333	Bart J. Currie, Menzies School Health Research, Australia
MSHR1940		E	Burkholderia pseudomallei	Australia	Clinical	335	Bart J. Currie, Menzies School Health Research, Australia
MSHR2581		E	Burkholderia pseudomallei	Australia	Clinical	335	Bart J. Currie, Menzies School Health Research, Australia
MSHR2973		E	Burkholderia pseudomallei	Australia	Clinical	335	Bart J. Currie, Menzies School Health Research, Australia
MSHR1917		E	Burkholderia pseudomallei	Australia	Clinical	434	Bart J. Currie, Menzies School Health Research, Australia
MSHR1935		E	Burkholderia pseudomallei	Australia	Clinical	434	Bart J. Currie, Menzies School Health Research, Australia
MSHR2262		E	Burkholderia pseudomallei	Australia	Clinical	435	Bart J. Currie, Menzies School Health Research, Australia
MSHR1910		C	Burkholderia pseudomallei	Australia	Clinical	459	Bart J. Currie, Menzies School Health Research, Australia
MSHR2156		C	Burkholderia pseudomallei	Australia	Clinical	464	Bart J. Currie, Menzies School Health Research, Australia
MSHR1922		E	Burkholderia pseudomallei	Australia	Clinical	468	Bart J. Currie, Menzies School Health Research, Australia
MSHR1986		E	Burkholderia pseudomallei	Australia	Clinical	468	Bart J. Currie, Menzies School Health Research, Australia
MSHR1779		E	Burkholderia pseudomallei	Australia	Clinical	470	Bart J. Currie, Menzies School Health Research, Australia
MSHR2981		C	Burkholderia pseudomallei	Australia	Clinical	553	Bart J. Currie, Menzies School Health Research, Australia
MSHR2204		C	Burkholderia pseudomallei	Australia	Clinical	563	Bart J. Currie, Menzies School Health Research, Australia
MSHR2969		E	Burkholderia pseudomallei	Australia	Clinical	675	Bart J. Currie, Menzies School Health Research, Australia
MSHR1816		C	Burkholderia pseudomallei	Australia	Clinical		Bart J. Currie, Menzies School Health Research, Australia
MSHR2252		C	Burkholderia pseudomallei	Australia	Clinical		Bart J. Currie, Menzies School Health Research, Australia
MSHR1883		CE	Burkholderia pseudomallei	Australia	Clinical		Bart J. Currie, Menzies School Health Research, Australia
MSHR1766		E	Burkholderia pseudomallei	Australia	Clinical		Bart J. Currie, Menzies School Health Research, Australia
MSHR2214		E	Burkholderia pseudomallei	Australia	Clinical		Bart J. Currie, Menzies School Health Research, Australia
MSHR1777		C	Burkholderia pseudomallei	Australia	Clinical		Bart J. Currie, Menzies School Health Research, Australia
MSHR1788		C	Burkholderia pseudomallei	Australia	Clinical		Bart J. Currie, Menzies School Health Research, Australia
MSHR1943		C	Burkholderia pseudomallei	Australia	Clinical		Bart J. Currie, Menzies School Health Research, Australia
MSHR1951		C	Burkholderia pseudomallei	Australia	Clinical		Bart J. Currie, Menzies School Health Research, Australia
MSHR2002		C	Burkholderia pseudomallei	Australia	Clinical		Bart J. Currie, Menzies School Health Research, Australia
MSHR2206		C	Burkholderia pseudomallei	Australia	Clinical		Bart J. Currie, Menzies School Health Research, Australia
MSHR2213		C	Burkholderia pseudomallei	Australia	Clinical		Bart J. Currie, Menzies School Health Research, Australia
MSHR2257		C	Burkholderia pseudomallei	Australia	Clinical		Bart J. Currie, Menzies School Health Research, Australia
MSHR2565		C	Burkholderia pseudomallei	Australia	Clinical		Bart J. Currie, Menzies School Health Research, Australia
MSHR2578		C	Burkholderia pseudomallei	Australia	Clinical		Bart J. Currie, Menzies School Health Research, Australia
MSHR2624		C	Burkholderia pseudomallei	Australia	Clinical		Bart J. Currie, Menzies School Health Research, Australia
MSHR3001		C	Burkholderia pseudomallei	Australia	Clinical		Bart J. Currie, Menzies School Health Research, Australia
MSHR2208		CE	Burkholderia pseudomallei	Australia	Clinical		Bart J. Currie, Menzies School Health Research, Australia
MSHR2236		CE	Burkholderia pseudomallei	Australia	Clinical		Bart J. Currie, Menzies School Health Research, Australia
MSHR2375		CE	Burkholderia pseudomallei	Australia	Clinical		Bart J. Currie, Menzies School Health Research, Australia
MSHR2585		CE	Burkholderia pseudomallei	Australia	Clinical		Bart J. Currie, Menzies School Health Research, Australia
MSHR2864		CE	Burkholderia pseudomallei	Australia	Clinical		Bart J. Currie, Menzies School Health Research, Australia
MSHR1711		E	Burkholderia pseudomallei	Australia	Clinical		Bart J. Currie, Menzies School Health Research, Australia
MSHR1768		E	Burkholderia pseudomallei	Australia	Clinical		Bart J. Currie, Menzies School Health Research, Australia
MSHR1956		E	Burkholderia pseudomallei	Australia	Clinical		Bart J. Currie, Menzies School Health Research, Australia
MSHR1959		E	Burkholderia pseudomallei	Australia	Clinical		Bart J. Currie, Menzies School Health Research, Australia
MSHR2060		E	Burkholderia pseudomallei	Australia	Clinical		Bart J. Currie, Menzies School Health Research, Australia
MSHR2138		E	Burkholderia pseudomallei	Australia	Clinical		Bart J. Currie, Menzies School Health Research, Australia
MSHR2190		E	Burkholderia pseudomallei	Australia	Clinical		Bart J. Currie, Menzies School Health Research, Australia
MSHR2197		E	Burkholderia pseudomallei	Australia	Clinical		Bart J. Currie, Menzies School Health Research, Australia
MSHR2205		E	Burkholderia pseudomallei	Australia	Clinical		Bart J. Currie, Menzies School Health Research, Australia
MSHR2212		E	Burkholderia pseudomallei	Australia	Clinical		Bart J. Currie, Menzies School Health Research, Australia
MSHR2221		E	Burkholderia pseudomallei	Australia	Clinical		Bart J. Currie, Menzies School Health Research, Australia
MSHR2235		E	Burkholderia pseudomallei	Australia	Clinical		Bart J. Currie, Menzies School Health Research, Australia
MSHR2245		E	Burkholderia pseudomallei	Australia	Clinical		Bart J. Currie, Menzies School Health Research, Australia
MSHR2263		E	Burkholderia pseudomallei	Australia	Clinical		Bart J. Currie, Menzies School Health Research, Australia
MSHR2268		E	Burkholderia pseudomallei	Australia	Clinical		Bart J. Currie, Menzies School Health Research, Australia
MSHR2376		E	Burkholderia pseudomallei	Australia	Clinical		Bart J. Currie, Menzies School Health Research, Australia
MSHR2583		E	Burkholderia pseudomallei	Australia	Clinical		Bart J. Currie, Menzies School Health Research, Australia
MSHR2990		E	Burkholderia pseudomallei	Australia	Clinical		Bart J. Currie, Menzies School Health Research, Australia
MSHR3043		C	Burkholderia pseudomallei	Australia	Clinical	36	Bart J. Currie, Menzies School Health Research, Australia
MSHR3096		CE	Burkholderia pseudomallei	Australia	Clinical	36	Bart J. Currie, Menzies School Health Research, Australia
MSHR3097		CE	Burkholderia pseudomallei	Australia	Clinical	36	Bart J. Currie, Menzies School Health Research, Australia
MSHR0608		E	Burkholderia pseudomallei	Australia	Clinical	109	Bart J. Currie, Menzies School Health Research, Australia
MSHR3111		E	Burkholderia pseudomallei	Australia	Environmental	109	Bart J. Currie, Menzies School Health Research, Australia
MSHR3112		E	Burkholderia pseudomallei	Australia	Environmental	109	Bart J. Currie, Menzies School Health Research, Australia
MSHR3093		CE	Burkholderia pseudomallei	Australia	Clinical	126	Bart J. Currie, Menzies School Health Research, Australia
MSHR3094		CE	Burkholderia pseudomallei	Australia	Clinical	126	Bart J. Currie, Menzies School Health Research, Australia
MSHR3095		CE	Burkholderia pseudomallei	Australia	Clinical	126	Bart J. Currie, Menzies School Health Research, Australia
MSHR1218		C	Burkholderia pseudomallei	Australia	Clinical	131	Bart J. Currie, Menzies School Health Research, Australia
MSHR1659		C	Burkholderia pseudomallei	Australia	Clinical	131	Bart J. Currie, Menzies School Health Research, Australia
MSHR3103		C	Burkholderia pseudomallei	Australia	Clinical	131	Bart J. Currie, Menzies School Health Research, Australia
MSHR3104		C	Burkholderia pseudomallei	Australia	Clinical	131	Bart J. Currie, Menzies School Health Research, Australia
MSHR3105		C	Burkholderia pseudomallei	Australia	Clinical	131	Bart J. Currie, Menzies School Health Research, Australia
MSHR3107		C	Burkholderia pseudomallei	Australia	Clinical	131	Bart J. Currie, Menzies School Health Research, Australia
MSHR3108		C	Burkholderia pseudomallei	Australia	Clinical	131	Bart J. Currie, Menzies School Health Research, Australia
MSHR3109		C	Burkholderia pseudomallei	Australia	Clinical	131	Bart J. Currie, Menzies School Health Research, Australia
MSHR0487		E	Burkholderia pseudomallei	Australia	Clinical	243	Bart J. Currie, Menzies School Health Research, Australia
MSHR1438		C	Burkholderia pseudomallei	Australia	Clinical	266	Bart J. Currie, Menzies School Health Research, Australia
MSHR1735		E	Burkholderia pseudomallei	Australia	Environmental	334	Bart J. Currie, Menzies School Health Research, Australia
MSHR0464A		C	Burkholderia pseudomallei	Australia	Clinical	553	Bart J. Currie, Menzies School Health Research, Australia
MSHR1849		E	Burkholderia pseudomallei	Australia	Clinical	639	Bart J. Currie, Menzies School Health Research, Australia
MSHR3110		E	Burkholderia pseudomallei	Australia	Clinical	639	Bart J. Currie, Menzies School Health Research, Australia
MSHR0376		C	Burkholderia pseudomallei	Australia	Clinical		Bart J. Currie, Menzies School Health Research, Australia
MSHR0335		C	Burkholderia pseudomallei	Australia	Clinical		Bart J. Currie, Menzies School Health Research, Australia
MSHR1056		C	Burkholderia pseudomallei	Australia	Clinical		Bart J. Currie, Menzies School Health Research, Australia
MSHR2255		C	Burkholderia pseudomallei	Australia	Clinical		Bart J. Currie, Menzies School Health Research, Australia
MSHR3073		CE	Burkholderia pseudomallei	Australia	Clinical		Bart J. Currie, Menzies School Health Research, Australia
MSHR3098		CE	Burkholderia pseudomallei	Australia	Environmental		Bart J. Currie, Menzies School Health Research, Australia
MSHR3099		CE	Burkholderia pseudomallei	Australia	Environmental		Bart J. Currie, Menzies School Health Research, Australia
MSHR3074		E	Burkholderia pseudomallei	Australia	Clinical		Bart J. Currie, Menzies School Health Research, Australia
MSHR3100		E	Burkholderia pseudomallei	Australia	Clinical		Bart J. Currie, Menzies School Health Research, Australia
MSHR3102		E	Burkholderia pseudomallei	Australia	Clinical		Bart J. Currie, Menzies School Health Research, Australia
MSHR0443A		CE	Burkholderia pseudomallei	Australia	Clinical		Bart J. Currie, Menzies School Health Research, Australia
MSHR0476		C	Burkholderia pseudomallei	Australia	Clinical	36	Bart J. Currie, Menzies School Health Research, Australia
MSHR0115		CE	Burkholderia pseudomallei	Australia	Clinical	36	Bart J. Currie, Menzies School Health Research, Australia
MSHR0135		CE	Burkholderia pseudomallei	Australia	Clinical	36	Bart J. Currie, Menzies School Health Research, Australia
MSHR0418		CE	Burkholderia pseudomallei	Australia	Clinical	36	Bart J. Currie, Menzies School Health Research, Australia
MSHR0520		CE	Burkholderia pseudomallei	Australia	Clinical	36	Bart J. Currie, Menzies School Health Research, Australia
MSHR0071		E	Burkholderia pseudomallei	Australia	Clinical	109	Bart J. Currie, Menzies School Health Research, Australia
MSHR0082		E	Burkholderia pseudomallei	Australia	Clinical	109	Bart J. Currie, Menzies School Health Research, Australia
MSHR0090		E	Burkholderia pseudomallei	Australia	Clinical	109	Bart J. Currie, Menzies School Health Research, Australia
MSHR0124		E	Burkholderia pseudomallei	Australia	Clinical	109	Bart J. Currie, Menzies School Health Research, Australia
MSHR0245		E	Burkholderia pseudomallei	Australia	Clinical	109	Bart J. Currie, Menzies School Health Research, Australia
MSHR0457		E	Burkholderia pseudomallei	Australia	Clinical	109	Bart J. Currie, Menzies School Health Research, Australia
MSHR0538		E	Burkholderia pseudomallei	Australia	Clinical	109	Bart J. Currie, Menzies School Health Research, Australia
MSHR0556		E	Burkholderia pseudomallei	Australia	Clinical	109	Bart J. Currie, Menzies School Health Research, Australia
MSHR0738		E	Burkholderia pseudomallei	Australia	Clinical	109	Bart J. Currie, Menzies School Health Research, Australia
MSHR0741		E	Burkholderia pseudomallei	Australia	Clinical	109	Bart J. Currie, Menzies School Health Research, Australia
MSHR0375		C	Burkholderia pseudomallei	Australia	Clinical	131	Bart J. Currie, Menzies School Health Research, Australia
MSHR0598		C	Burkholderia pseudomallei	Australia	Clinical	131	Bart J. Currie, Menzies School Health Research, Australia
MSHR0781		C	Burkholderia pseudomallei	Australia	Clinical	131	Bart J. Currie, Menzies School Health Research, Australia
MSHR0053		C	Burkholderia pseudomallei	Australia	Clinical	132	Bart J. Currie, Menzies School Health Research, Australia
MSHR0057		C	Burkholderia pseudomallei	Australia	Clinical	132	Bart J. Currie, Menzies School Health Research, Australia
MSHR0100		C	Burkholderia pseudomallei	Australia	Clinical	132	Bart J. Currie, Menzies School Health Research, Australia
MSHR0101		C	Burkholderia pseudomallei	Australia	Clinical	132	Bart J. Currie, Menzies School Health Research, Australia
MSHR0260		C	Burkholderia pseudomallei	Australia	Clinical	132	Bart J. Currie, Menzies School Health Research, Australia
MSHR0393A		C	Burkholderia pseudomallei	Australia	Clinical	132	Bart J. Currie, Menzies School Health Research, Australia
MSHR0394		C	Burkholderia pseudomallei	Australia	Clinical	132	Bart J. Currie, Menzies School Health Research, Australia
MSHR0400		C	Burkholderia pseudomallei	Australia	Clinical	132	Bart J. Currie, Menzies School Health Research, Australia
MSHR0471		C	Burkholderia pseudomallei	Australia	Clinical	132	Bart J. Currie, Menzies School Health Research, Australia
MSHR0489		C	Burkholderia pseudomallei	Australia	Clinical	132	Bart J. Currie, Menzies School Health Research, Australia
MSHR0499		C	Burkholderia pseudomallei	Australia	Clinical	132	Bart J. Currie, Menzies School Health Research, Australia
MSHR0632		C	Burkholderia pseudomallei	Australia	Clinical	132	Bart J. Currie, Menzies School Health Research, Australia
MSHR0070		E	Burkholderia pseudomallei	Australia	Clinical	135	Bart J. Currie, Menzies School Health Research, Australia
MSHR0478		E	Burkholderia pseudomallei	Australia	Clinical	135	Bart J. Currie, Menzies School Health Research, Australia
MSHR0597		E	Burkholderia pseudomallei	Australia	Clinical	135	Bart J. Currie, Menzies School Health Research, Australia
MSHR0084		C	Burkholderia pseudomallei	Australia	Clinical	144	Bart J. Currie, Menzies School Health Research, Australia
MSHR0461		C	Burkholderia pseudomallei	Australia	Clinical	144	Bart J. Currie, Menzies School Health Research, Australia
MSHR0061		C	Burkholderia pseudomallei	Australia	Clinical	249	Bart J. Currie, Menzies School Health Research, Australia
MSHR0454		E	Burkholderia pseudomallei	Australia	Animal	257	Bart J. Currie, Menzies School Health Research, Australia
MSHR0222		E	Burkholderia pseudomallei	Australia	Clinical	259	Bart J. Currie, Menzies School Health Research, Australia
MSHR0671		CE	Burkholderia pseudomallei	Australia	Clinical	275	Bart J. Currie, Menzies School Health Research, Australia
MSHR0390		CE	Burkholderia pseudomallei	Australia	Clinical	279	Bart J. Currie, Menzies School Health Research, Australia
MSHR0541		E	Burkholderia pseudomallei	Australia	Clinical	320	Bart J. Currie, Menzies School Health Research, Australia
MSHR0270		E	Burkholderia pseudomallei	Australia	Clinical	325	Bart J. Currie, Menzies School Health Research, Australia
MSHR0389A		E	Burkholderia pseudomallei	Australia	Clinical	329	Bart J. Currie, Menzies School Health Research, Australia
MSHR0550		C	Burkholderia pseudomallei	Australia	Clinical	333	Bart J. Currie, Menzies School Health Research, Australia
MSHR0364		E	Burkholderia pseudomallei	Australia	Clinical	429	Bart J. Currie, Menzies School Health Research, Australia
MSHR0716		E	Burkholderia pseudomallei	Australia	Clinical	429	Bart J. Currie, Menzies School Health Research, Australia
MSHR0452		E	Burkholderia pseudomallei	Australia	Animal	432	Bart J. Currie, Menzies School Health Research, Australia
MSHR0224		CE	Burkholderia pseudomallei	Australia	Clinical	452	Bart J. Currie, Menzies School Health Research, Australia
MSHR0243		CE	Burkholderia pseudomallei	Australia	Clinical	454	Bart J. Currie, Menzies School Health Research, Australia
MSHR0251		E	Burkholderia pseudomallei	Australia	Clinical	456	Bart J. Currie, Menzies School Health Research, Australia
MSHR0258		C	Burkholderia pseudomallei	Australia	Clinical	457	Bart J. Currie, Menzies School Health Research, Australia
MSHR0273		C	Burkholderia pseudomallei	Australia	Clinical	458	Bart J. Currie, Menzies School Health Research, Australia
MSHR0333		CE	Burkholderia pseudomallei	Australia	Clinical	459	Bart J. Currie, Menzies School Health Research, Australia
MSHR0349		E	Burkholderia pseudomallei	Australia	Clinical	461	Bart J. Currie, Menzies School Health Research, Australia
MSHR0405		E	Burkholderia pseudomallei	Australia	Clinical	463	Bart J. Currie, Menzies School Health Research, Australia
MSHR0440		C	Burkholderia pseudomallei	Australia	Clinical	464	Bart J. Currie, Menzies School Health Research, Australia
MSHR0583		C	Burkholderia pseudomallei	Australia	Clinical	464	Bart J. Currie, Menzies School Health Research, Australia
MSHR0709		C	Burkholderia pseudomallei	Australia	Clinical	464	Bart J. Currie, Menzies School Health Research, Australia
MSHR0479		E	Burkholderia pseudomallei	Australia	Clinical	465	Bart J. Currie, Menzies School Health Research, Australia
MSHR0522		C	Burkholderia pseudomallei	Australia	Clinical	466	Bart J. Currie, Menzies School Health Research, Australia
MSHR0548		E	Burkholderia pseudomallei	Australia	Clinical	468	Bart J. Currie, Menzies School Health Research, Australia
MSHR0715		E	Burkholderia pseudomallei	Australia	Clinical	470	Bart J. Currie, Menzies School Health Research, Australia
MSHR0728		E	Burkholderia pseudomallei	Australia	Clinical	471	Bart J. Currie, Menzies School Health Research, Australia
MSHR0752		CE	Burkholderia pseudomallei	Australia	Clinical	472	Bart J. Currie, Menzies School Health Research, Australia
MSHR0372A		E	Burkholderia pseudomallei	Australia	Clinical	478	Bart J. Currie, Menzies School Health Research, Australia
MSHR0374A		CE	Burkholderia pseudomallei	Australia	Clinical	479	Bart J. Currie, Menzies School Health Research, Australia
MSHR0439A		CE	Burkholderia pseudomallei	Australia	Clinical	480	Bart J. Currie, Menzies School Health Research, Australia
MSHR0087		E	Burkholderia pseudomallei	Australia	Clinical	481	Bart J. Currie, Menzies School Health Research, Australia
MSHR0466A		E	Burkholderia pseudomallei	Australia	Clinical	481	Bart J. Currie, Menzies School Health Research, Australia
MSHR0059		C	Burkholderia pseudomallei	Australia	Clinical	483	Bart J. Currie, Menzies School Health Research, Australia
MSHR0063		C	Burkholderia pseudomallei	Australia	Clinical	483	Bart J. Currie, Menzies School Health Research, Australia
MSHR0176		C	Burkholderia pseudomallei	Australia	Clinical	483	Bart J. Currie, Menzies School Health Research, Australia
MSHR0488B		C	Burkholderia pseudomallei	Australia	Clinical	483	Bart J. Currie, Menzies School Health Research, Australia
MSHR0602		C	Burkholderia pseudomallei	Australia	Clinical	483	Bart J. Currie, Menzies School Health Research, Australia
MSHR0637		C	Burkholderia pseudomallei	Australia	Clinical	483	Bart J. Currie, Menzies School Health Research, Australia
MSHR0060		C	Burkholderia pseudomallei	Australia	Clinical	553	Bart J. Currie, Menzies School Health Research, Australia
MSHR0806		C	Burkholderia pseudomallei	Australia	Clinical	553	Bart J. Currie, Menzies School Health Research, Australia
MSHR0119		C	Burkholderia pseudomallei	Australia	Clinical	555	Bart J. Currie, Menzies School Health Research, Australia
MSHR0054		C	Burkholderia pseudomallei	Australia	Clinical	574	Bart J. Currie, Menzies School Health Research, Australia
MSHR0075		E	Burkholderia pseudomallei	Australia	Clinical	575	Bart J. Currie, Menzies School Health Research, Australia
MSHR0546		E	Burkholderia pseudomallei	Australia	Clinical	575	Bart J. Currie, Menzies School Health Research, Australia
MSHR0072		E	Burkholderia pseudomallei	Australia	Clinical	577	Bart J. Currie, Menzies School Health Research, Australia
MSHR0081		E	Burkholderia pseudomallei	Australia	Clinical	578	Bart J. Currie, Menzies School Health Research, Australia
MSHR0089		E	Burkholderia pseudomallei	Australia	Clinical	580	Bart J. Currie, Menzies School Health Research, Australia
MSHR0093		E	Burkholderia pseudomallei	Australia	Clinical	581	Bart J. Currie, Menzies School Health Research, Australia
MSHR0098		E	Burkholderia pseudomallei	Australia	Clinical	582	Bart J. Currie, Menzies School Health Research, Australia
MSHR0107		CE	Burkholderia pseudomallei	Australia	Clinical	583	Bart J. Currie, Menzies School Health Research, Australia
MSHR0113		CE	Burkholderia pseudomallei	Australia	Clinical	584	Bart J. Currie, Menzies School Health Research, Australia
MSHR0182		E	Burkholderia pseudomallei	Australia	Clinical	585	Bart J. Currie, Menzies School Health Research, Australia
MSHR1924		G	Burkholderia pseudomallei	Australia	Clinical	552	Bart J. Currie, Menzies School Health Research, Australia
MSHR0918		C	Burkholderia pseudomallei	Australia	Clinical	36	Bart J. Currie, Menzies School Health Research, Australia
MSHR1634		C	Burkholderia pseudomallei	Australia	Clinical	36	Bart J. Currie, Menzies School Health Research, Australia
MSHR2078		C	Burkholderia pseudomallei	Australia	Clinical	36	Bart J. Currie, Menzies School Health Research, Australia
MSHR0816		CE	Burkholderia pseudomallei	Australia	Clinical	36	Bart J. Currie, Menzies School Health Research, Australia
MSHR0882		CE	Burkholderia pseudomallei	Australia	Clinical	36	Bart J. Currie, Menzies School Health Research, Australia
MSHR1926		CE	Burkholderia pseudomallei	Australia	Clinical	36	Bart J. Currie, Menzies School Health Research, Australia
MSHR1953		CE	Burkholderia pseudomallei	Australia	Clinical	36	Bart J. Currie, Menzies School Health Research, Australia
MSHR2435		CE	Burkholderia pseudomallei	Australia	Clinical	36	Bart J. Currie, Menzies School Health Research, Australia
MSHR0811		E	Burkholderia pseudomallei	Australia	Clinical	109	Bart J. Currie, Menzies School Health Research, Australia
MSHR0883		E	Burkholderia pseudomallei	Australia	Clinical	109	Bart J. Currie, Menzies School Health Research, Australia
MSHR0889		E	Burkholderia pseudomallei	Australia	Clinical	109	Bart J. Currie, Menzies School Health Research, Australia
MSHR1189		E	Burkholderia pseudomallei	Australia	Clinical	109	Bart J. Currie, Menzies School Health Research, Australia
MSHR1338		E	Burkholderia pseudomallei	Australia	Clinical	109	Bart J. Currie, Menzies School Health Research, Australia
MSHR1714		E	Burkholderia pseudomallei	Australia	Clinical	109	Bart J. Currie, Menzies School Health Research, Australia
MSHR1754		E	Burkholderia pseudomallei	Australia	Clinical	109	Bart J. Currie, Menzies School Health Research, Australia
MSHR1828		E	Burkholderia pseudomallei	Australia	Clinical	109	Bart J. Currie, Menzies School Health Research, Australia
MSHR1952		E	Burkholderia pseudomallei	Australia	Clinical	109	Bart J. Currie, Menzies School Health Research, Australia
MSHR1960		E	Burkholderia pseudomallei	Australia	Clinical	109	Bart J. Currie, Menzies School Health Research, Australia
MSHR2016		E	Burkholderia pseudomallei	Australia	Clinical	109	Bart J. Currie, Menzies School Health Research, Australia
MSHR2406		E	Burkholderia pseudomallei	Australia	Clinical	109	Bart J. Currie, Menzies School Health Research, Australia
MSHR2436		E	Burkholderia pseudomallei	Australia	Clinical	109	Bart J. Currie, Menzies School Health Research, Australia
MSHR1789		C	Burkholderia pseudomallei	Australia	Clinical	115	Bart J. Currie, Menzies School Health Research, Australia
MSHR2407		E	Burkholderia pseudomallei	Australia	Clinical	116	Bart J. Currie, Menzies School Health Research, Australia
MSHR1057		C	Burkholderia pseudomallei	Australia	Clinical	131	Bart J. Currie, Menzies School Health Research, Australia
MSHR1074		C	Burkholderia pseudomallei	Australia	Clinical	131	Bart J. Currie, Menzies School Health Research, Australia
MSHR1285		C	Burkholderia pseudomallei	Australia	Clinical	131	Bart J. Currie, Menzies School Health Research, Australia
MSHR1287		C	Burkholderia pseudomallei	Australia	Clinical	131	Bart J. Currie, Menzies School Health Research, Australia
MSHR0815		CE	Burkholderia pseudomallei	Australia	Clinical	131	Bart J. Currie, Menzies School Health Research, Australia
MSHR1055		CE	Burkholderia pseudomallei	Australia	Clinical	131	Bart J. Currie, Menzies School Health Research, Australia
MSHR0846		C	Burkholderia pseudomallei	Australia	Clinical	132	Bart J. Currie, Menzies School Health Research, Australia
MSHR0906		C	Burkholderia pseudomallei	Australia	Clinical	132	Bart J. Currie, Menzies School Health Research, Australia
MSHR1025		C	Burkholderia pseudomallei	Australia	Clinical	132	Bart J. Currie, Menzies School Health Research, Australia
MSHR1076		C	Burkholderia pseudomallei	Australia	Clinical	132	Bart J. Currie, Menzies School Health Research, Australia
MSHR1124		C	Burkholderia pseudomallei	Australia	Clinical	132	Bart J. Currie, Menzies School Health Research, Australia
MSHR1205		C	Burkholderia pseudomallei	Australia	Clinical	132	Bart J. Currie, Menzies School Health Research, Australia
MSHR1746		C	Burkholderia pseudomallei	Australia	Clinical	132	Bart J. Currie, Menzies School Health Research, Australia
MSHR0866		E	Burkholderia pseudomallei	Australia	Clinical	141	Bart J. Currie, Menzies School Health Research, Australia
MSHR0939		C	Burkholderia pseudomallei	Australia	Clinical	144	Bart J. Currie, Menzies School Health Research, Australia
MSHR1078		C	Burkholderia pseudomallei	Australia	Clinical	144	Bart J. Currie, Menzies School Health Research, Australia
MSHR1083		C	Burkholderia pseudomallei	Australia	Clinical	144	Bart J. Currie, Menzies School Health Research, Australia
MSHR1165		C	Burkholderia pseudomallei	Australia	Clinical	144	Bart J. Currie, Menzies School Health Research, Australia
MSHR1166		C	Burkholderia pseudomallei	Australia	Clinical	144	Bart J. Currie, Menzies School Health Research, Australia
MSHR1332		C	Burkholderia pseudomallei	Australia	Clinical	144	Bart J. Currie, Menzies School Health Research, Australia
MSHR1968		C	Burkholderia pseudomallei	Australia	Clinical	144	Bart J. Currie, Menzies School Health Research, Australia
MSHR1328		E	Burkholderia pseudomallei	Australia	Clinical	259	Bart J. Currie, Menzies School Health Research, Australia
MSHR1574		E	Burkholderia pseudomallei	Australia	Clinical	259	Bart J. Currie, Menzies School Health Research, Australia
MSHR1583		E	Burkholderia pseudomallei	Australia	Clinical	259	Bart J. Currie, Menzies School Health Research, Australia
MSHR2413		CE	Burkholderia pseudomallei	Australia	Clinical	275	Bart J. Currie, Menzies School Health Research, Australia
MSHR1763		CE	Burkholderia pseudomallei	Australia	Clinical	279	Bart J. Currie, Menzies School Health Research, Australia
MSHR2442		CE	Burkholderia pseudomallei	Australia	Clinical	279	Bart J. Currie, Menzies School Health Research, Australia
MSHR1969		E	Burkholderia pseudomallei	Australia	Clinical	320	Bart J. Currie, Menzies School Health Research, Australia
MSHR2449		E	Burkholderia pseudomallei	Australia	Clinical	320	Bart J. Currie, Menzies School Health Research, Australia
MSHR0917		C	Burkholderia pseudomallei	Australia	Clinical	327	Bart J. Currie, Menzies School Health Research, Australia
MSHR0818		E	Burkholderia pseudomallei	Australia	Clinical	329	Bart J. Currie, Menzies School Health Research, Australia
MSHR1061		C	Burkholderia pseudomallei	Australia	Clinical	332	Bart J. Currie, Menzies School Health Research, Australia
MSHR2028		C	Burkholderia pseudomallei	Australia	Clinical	333	Bart J. Currie, Menzies School Health Research, Australia
MSHR1379		E	Burkholderia pseudomallei	Australia	Clinical	335	Bart J. Currie, Menzies School Health Research, Australia
MSHR1584		E	Burkholderia pseudomallei	Australia	Clinical	335	Bart J. Currie, Menzies School Health Research, Australia
MSHR1608		E	Burkholderia pseudomallei	Australia	Clinical	335	Bart J. Currie, Menzies School Health Research, Australia
MSHR1635		E	Burkholderia pseudomallei	Australia	Clinical	335	Bart J. Currie, Menzies School Health Research, Australia
MSHR1822		E	Burkholderia pseudomallei	Australia	Clinical	335	Bart J. Currie, Menzies School Health Research, Australia
MSHR0912		E	Burkholderia pseudomallei	Australia	Clinical	337	Bart J. Currie, Menzies School Health Research, Australia
MSHR0953		C	Burkholderia pseudomallei	Australia	Clinical	464	Bart J. Currie, Menzies School Health Research, Australia
MSHR1027		C	Burkholderia pseudomallei	Australia	Clinical	464	Bart J. Currie, Menzies School Health Research, Australia
MSHR1169		C	Burkholderia pseudomallei	Australia	Clinical	464	Bart J. Currie, Menzies School Health Research, Australia
MSHR1373		C	Burkholderia pseudomallei	Australia	Clinical	466	Bart J. Currie, Menzies School Health Research, Australia
MSHR2409		GE	Burkholderia pseudomallei	Australia	Clinical	476	Bart J. Currie, Menzies School Health Research, Australia
MSHR2441		CE	Burkholderia pseudomallei	Australia	Clinical	480	Bart J. Currie, Menzies School Health Research, Australia
MSHR0958		C	Burkholderia pseudomallei	Australia	Clinical	483	Bart J. Currie, Menzies School Health Research, Australia
MSHR1186		C	Burkholderia pseudomallei	Australia	Clinical	483	Bart J. Currie, Menzies School Health Research, Australia
MSHR2451		C	Burkholderia pseudomallei	Australia	Clinical	483	Bart J. Currie, Menzies School Health Research, Australia
MSHR0923		C	Burkholderia pseudomallei	Australia	Clinical	553	Bart J. Currie, Menzies School Health Research, Australia
MSHR1458		C	Burkholderia pseudomallei	Australia	Clinical	553	Bart J. Currie, Menzies School Health Research, Australia
MSHR2040		C	Burkholderia pseudomallei	Australia	Clinical	553	Bart J. Currie, Menzies School Health Research, Australia
MSHR0974		E	Burkholderia pseudomallei	Australia	Clinical	554	Bart J. Currie, Menzies School Health Research, Australia
MSHR1000		C	Burkholderia pseudomallei	Australia	Clinical	555	Bart J. Currie, Menzies School Health Research, Australia
MSHR1384		E	Burkholderia pseudomallei	Australia	Clinical	557	Bart J. Currie, Menzies School Health Research, Australia
MSHR1632		E	Burkholderia pseudomallei	Australia	Clinical	559	Bart J. Currie, Menzies School Health Research, Australia
MSHR1709		E	Burkholderia pseudomallei	Australia	Clinical	560	Bart J. Currie, Menzies School Health Research, Australia
MSHR1759		C	Burkholderia pseudomallei	Australia	Clinical	561	Bart J. Currie, Menzies School Health Research, Australia
MSHR1967		E	Burkholderia pseudomallei	Australia	Clinical	562	Bart J. Currie, Menzies School Health Research, Australia
MSHR2437		E	Burkholderia pseudomallei	Australia	Clinical	563	Bart J. Currie, Menzies School Health Research, Australia
MSHR2453		E	Burkholderia pseudomallei	Australia	Clinical	564	Bart J. Currie, Menzies School Health Research, Australia
MSHR0884		C	Burkholderia pseudomallei	Australia	Clinical	587	Bart J. Currie, Menzies School Health Research, Australia
MSHR0902		E	Burkholderia pseudomallei	Australia	Clinical	588	Bart J. Currie, Menzies School Health Research, Australia
MSHR2650		C	Burkholderia pseudomallei	Australia	Environmental	36	Bart J. Currie, Menzies School Health Research, Australia
MSHR2657		C	Burkholderia pseudomallei	Australia	Environmental	36	Bart J. Currie, Menzies School Health Research, Australia
MSHR2786		C	Burkholderia pseudomallei	Australia	Environmental	36	Bart J. Currie, Menzies School Health Research, Australia
MSHR2788		C	Burkholderia pseudomallei	Australia	Environmental	36	Bart J. Currie, Menzies School Health Research, Australia
MSHR2836		C	Burkholderia pseudomallei	Australia	Environmental	36	Bart J. Currie, Menzies School Health Research, Australia
MSHR2429		E	Burkholderia pseudomallei	Australia	Environmental	109	Bart J. Currie, Menzies School Health Research, Australia
MSHR2430		E	Burkholderia pseudomallei	Australia	Environmental	109	Bart J. Currie, Menzies School Health Research, Australia
MSHR2476		E	Burkholderia pseudomallei	Australia	Environmental	109	Bart J. Currie, Menzies School Health Research, Australia
MSHR2477		E	Burkholderia pseudomallei	Australia	Environmental	109	Bart J. Currie, Menzies School Health Research, Australia
MSHR2478		E	Burkholderia pseudomallei	Australia	Environmental	109	Bart J. Currie, Menzies School Health Research, Australia
MSHR2511		E	Burkholderia pseudomallei	Australia	Clinical	109	Bart J. Currie, Menzies School Health Research, Australia
MSHR2535		E	Burkholderia pseudomallei	Australia	Clinical	109	Bart J. Currie, Menzies School Health Research, Australia
MSHR2566		E	Burkholderia pseudomallei	Australia	Environmental	109	Bart J. Currie, Menzies School Health Research, Australia
MSHR2569		E	Burkholderia pseudomallei	Australia	Environmental	109	Bart J. Currie, Menzies School Health Research, Australia
MSHR2635		E	Burkholderia pseudomallei	Australia	Environmental	109	Bart J. Currie, Menzies School Health Research, Australia
MSHR2649		E	Burkholderia pseudomallei	Australia	Environmental	109	Bart J. Currie, Menzies School Health Research, Australia
MSHR2770		E	Burkholderia pseudomallei	Australia	Environmental	109	Bart J. Currie, Menzies School Health Research, Australia
MSHR2773		E	Burkholderia pseudomallei	Australia	Environmental	109	Bart J. Currie, Menzies School Health Research, Australia
MSHR2777		E	Burkholderia pseudomallei	Australia	Environmental	109	Bart J. Currie, Menzies School Health Research, Australia
MSHR2818		E	Burkholderia pseudomallei	Australia	Environmental	109	Bart J. Currie, Menzies School Health Research, Australia
MSHR2855		E	Burkholderia pseudomallei	Australia	Environmental	109	Bart J. Currie, Menzies School Health Research, Australia
MSHR2791		C	Burkholderia pseudomallei	Australia	Environmental	121	Bart J. Currie, Menzies School Health Research, Australia
MSHR2426		C	Burkholderia pseudomallei	Australia	Environmental	132	Bart J. Currie, Menzies School Health Research, Australia
MSHR2472		C	Burkholderia pseudomallei	Australia	Clinical	132	Bart J. Currie, Menzies School Health Research, Australia
MSHR2485		C	Burkholderia pseudomallei	Australia	Environmental	132	Bart J. Currie, Menzies School Health Research, Australia
MSHR2486		C	Burkholderia pseudomallei	Australia	Environmental	132	Bart J. Currie, Menzies School Health Research, Australia
MSHR2639		C	Burkholderia pseudomallei	Australia	Environmental	132	Bart J. Currie, Menzies School Health Research, Australia
MSHR2640		C	Burkholderia pseudomallei	Australia	Environmental	132	Bart J. Currie, Menzies School Health Research, Australia
MSHR2641		C	Burkholderia pseudomallei	Australia	Environmental	132	Bart J. Currie, Menzies School Health Research, Australia
MSHR2646		C	Burkholderia pseudomallei	Australia	Environmental	132	Bart J. Currie, Menzies School Health Research, Australia
MSHR2661		C	Burkholderia pseudomallei	Australia	Environmental	132	Bart J. Currie, Menzies School Health Research, Australia
MSHR2747		C	Burkholderia pseudomallei	Australia	Environmental	132	Bart J. Currie, Menzies School Health Research, Australia
MSHR2752		C	Burkholderia pseudomallei	Australia	Environmental	132	Bart J. Currie, Menzies School Health Research, Australia
MSHR2758		C	Burkholderia pseudomallei	Australia	Environmental	132	Bart J. Currie, Menzies School Health Research, Australia
MSHR2763		C	Burkholderia pseudomallei	Australia	Environmental	132	Bart J. Currie, Menzies School Health Research, Australia
MSHR2480		C	Burkholderia pseudomallei	Australia	Environmental	144	Bart J. Currie, Menzies School Health Research, Australia
MSHR2482		C	Burkholderia pseudomallei	Australia	Environmental	144	Bart J. Currie, Menzies School Health Research, Australia
MSHR2810		CE	Burkholderia pseudomallei	Australia	Environmental	144	Bart J. Currie, Menzies School Health Research, Australia
MSHR2814		CE	Burkholderia pseudomallei	Australia	Environmental	144	Bart J. Currie, Menzies School Health Research, Australia
MSHR2817		CE	Burkholderia pseudomallei	Australia	Environmental	144	Bart J. Currie, Menzies School Health Research, Australia
MSHR2489		C	Burkholderia pseudomallei	Australia	Environmental	266	Bart J. Currie, Menzies School Health Research, Australia
MSHR2490		C	Burkholderia pseudomallei	Australia	Environmental	266	Bart J. Currie, Menzies School Health Research, Australia
MSHR2424		E	Burkholderia pseudomallei	Australia	Environmental	320	Bart J. Currie, Menzies School Health Research, Australia
MSHR2427		E	Burkholderia pseudomallei	Australia	Environmental	320	Bart J. Currie, Menzies School Health Research, Australia
MSHR2475		E	Burkholderia pseudomallei	Australia	Environmental	320	Bart J. Currie, Menzies School Health Research, Australia
MSHR2545		E	Burkholderia pseudomallei	Australia	Clinical	320	Bart J. Currie, Menzies School Health Research, Australia
MSHR2637		E	Burkholderia pseudomallei	Australia	Environmental	320	Bart J. Currie, Menzies School Health Research, Australia
MSHR2738		C	Burkholderia pseudomallei	Australia	Environmental	326	Bart J. Currie, Menzies School Health Research, Australia
MSHR2856		C	Burkholderia pseudomallei	Australia	Environmental	326	Bart J. Currie, Menzies School Health Research, Australia
MSHR2538		C	Burkholderia pseudomallei	Australia	Clinical	327	Bart J. Currie, Menzies School Health Research, Australia
MSHR2488		C	Burkholderia pseudomallei	Australia	Environmental	332	Bart J. Currie, Menzies School Health Research, Australia
MSHR2858		C	Burkholderia pseudomallei	Australia	Environmental	332	Bart J. Currie, Menzies School Health Research, Australia
MSHR2780		C	Burkholderia pseudomallei	Australia	Environmental	333	Bart J. Currie, Menzies School Health Research, Australia
MSHR2778		CE	Burkholderia pseudomallei	Australia	Environmental	333	Bart J. Currie, Menzies School Health Research, Australia
MSHR2516		E	Burkholderia pseudomallei	Australia	Clinical	335	Bart J. Currie, Menzies School Health Research, Australia
MSHR2828		CE	Burkholderia pseudomallei	Australia	Environmental	480	Bart J. Currie, Menzies School Health Research, Australia
MSHR2833		CE	Burkholderia pseudomallei	Australia	Environmental	480	Bart J. Currie, Menzies School Health Research, Australia
MSHR2530		C	Burkholderia pseudomallei	Australia	Clinical	553	Bart J. Currie, Menzies School Health Research, Australia
MSHR2783		C	Burkholderia pseudomallei	Australia	Environmental	553	Bart J. Currie, Menzies School Health Research, Australia
MSHR2532		E	Burkholderia pseudomallei	Australia	Clinical	562	Bart J. Currie, Menzies School Health Research, Australia
MSHR2524		C	Burkholderia pseudomallei	Australia	Clinical	572	Bart J. Currie, Menzies School Health Research, Australia
MSHR2547		E	Burkholderia pseudomallei	Australia	Clinical	573	Bart J. Currie, Menzies School Health Research, Australia
MSHR2820		E	Burkholderia pseudomallei	Australia	Environmental	594	Bart J. Currie, Menzies School Health Research, Australia
MSHR2663		E	Burkholderia pseudomallei	Australia	Environmental	635	Bart J. Currie, Menzies School Health Research, Australia
MSHR2668		E	Burkholderia pseudomallei	Australia	Environmental	635	Bart J. Currie, Menzies School Health Research, Australia
MSHR2673		E	Burkholderia pseudomallei	Australia	Environmental	635	Bart J. Currie, Menzies School Health Research, Australia
MSHR2690		E	Burkholderia pseudomallei	Australia	Environmental	636	Bart J. Currie, Menzies School Health Research, Australia
MSHR2699		CE	Burkholderia pseudomallei	Australia	Environmental	637	Bart J. Currie, Menzies School Health Research, Australia
MSHR2706		CE	Burkholderia pseudomallei	Australia	Environmental	637	Bart J. Currie, Menzies School Health Research, Australia
MSHR2710		C	Burkholderia pseudomallei	Australia	Environmental	638	Bart J. Currie, Menzies School Health Research, Australia
MSHR2732		E	Burkholderia pseudomallei	Australia	Environmental	639	Bart J. Currie, Menzies School Health Research, Australia
MSHR2739		E	Burkholderia pseudomallei	Australia	Environmental	640	Bart J. Currie, Menzies School Health Research, Australia
MSHR2742		E	Burkholderia pseudomallei	Australia	Environmental	640	Bart J. Currie, Menzies School Health Research, Australia
MSHR2797		E	Burkholderia pseudomallei	Australia	Environmental	641	Bart J. Currie, Menzies School Health Research, Australia
MSHR2825		CE	Burkholderia pseudomallei	Australia	Environmental	642	Bart J. Currie, Menzies School Health Research, Australia
MSHR2853		E	Burkholderia pseudomallei	Australia	Environmental	644	Bart J. Currie, Menzies School Health Research, Australia
MSHR2854		E	Burkholderia pseudomallei	Australia	Environmental	644	Bart J. Currie, Menzies School Health Research, Australia
2002721123	H0929, 98-33	G	Burkholderia pseudomallei	Puerto Rico	Clinical		Apichai Tuanyok, NAU, Arizona
2002721628	25	G	Burkholderia pseudomallei	Madagascar	Environmental		Apichai Tuanyok, NAU, Arizona
2002721629	31	G	Burkholderia pseudomallei	Kenya	Environmental		Apichai Tuanyok, NAU, Arizona
Bp 99051902		G	Burkholderia pseudomallei	Unknown	Clinical		Apichai Tuanyok, NAU, Arizona
2002721624	104	C	Burkholderia pseudomallei	Australia	Animal		Apichai Tuanyok, NAU, Arizona
2002721639	66	C	Burkholderia pseudomallei	Kenya	Clinical		Apichai Tuanyok, NAU, Arizona
2002721640	67	C	Burkholderia pseudomallei	Papua New Guinea	Clinical		Apichai Tuanyok, NAU, Arizona
2002721772	Smith 002025	C	Burkholderia pseudomallei	Unknown	Unknown		Apichai Tuanyok, NAU, Arizona
DL01		C	Burkholderia pseudomallei	Thailand	Clinical		Apichai Tuanyok, NAU, Arizona
MSHR0423		C	Burkholderia pseudomallei	Australia	Clinical		Bart J. Currie, Menzies School Health Research, Australia
MSHR0503		C	Burkholderia pseudomallei	Australia	Environmental		Bart J. Currie, Menzies School Health Research, Australia
MSHR0644		C	Burkholderia pseudomallei	Australia	Clinical		Bart J. Currie, Menzies School Health Research, Australia
MSHR0713		C	Burkholderia pseudomallei	Australia	Clinical		Bart J. Currie, Menzies School Health Research, Australia
2002721162	B7210	CE	Burkholderia pseudomallei	Australia	Clinical		Apichai Tuanyok, NAU, Arizona
2002721712	Songkhla 34 W-2	CE	Burkholderia pseudomallei	Thailand	Environmental		Apichai Tuanyok, NAU, Arizona
2002721785	STW 214	CE	Burkholderia pseudomallei	Thailand	Environmental		Apichai Tuanyok, NAU, Arizona
2002734647	1010-3259	CE	Burkholderia pseudomallei	India	Clinical		Apichai Tuanyok, NAU, Arizona
1026b		CE	Burkholderia pseudomallei	Thailand	Clinical		Apichai Tuanyok, NAU, Arizona ( This strain was obtained from Dr. Don Woods, University of Calgary, Canada)
319a		CE	Burkholderia pseudomallei	Thailand	Clinical		Apichai Tuanyok, NAU, Arizona ( This strain was obtained from Dr. Don Woods, University of Calgary, Canada)
MSHR0112c		CE	Burkholderia pseudomallei	Australia	Clinical		Bart J. Currie, Menzies School Health Research, Australia
MSHR0730		CE	Burkholderia pseudomallei	Australia	Clinical		Bart J. Currie, Menzies School Health Research, Australia
2000032026	G9709	E	Burkholderia pseudomallei	India	Unknown		Apichai Tuanyok, NAU, Arizona
2002721178	G1467	E	Burkholderia pseudomallei	Papua New Guinea	Unknown		Apichai Tuanyok, NAU, Arizona
2002721617	5, NCTC8016	E	Burkholderia pseudomallei	Australia	Animal		Apichai Tuanyok, NAU, Arizona
2002721631	83	E	Burkholderia pseudomallei	Australia	Environmental		Apichai Tuanyok, NAU, Arizona
2002721632	84	E	Burkholderia pseudomallei	Australia	Environmental		Apichai Tuanyok, NAU, Arizona
2002721636	6, NCTC10276	E	Burkholderia pseudomallei	Bangledesh	Clinical		Apichai Tuanyok, NAU, Arizona
2002721637	9	E	Burkholderia pseudomallei	Pakistan	Clinical		Apichai Tuanyok, NAU, Arizona
2002721715	UB -8-soil 2	E	Burkholderia pseudomallei	Thailand	Environmental		Apichai Tuanyok, NAU, Arizona
2006001614	2005-000035	E	Burkholderia pseudomallei	India	Clinical		Apichai Tuanyok, NAU, Arizona
Bp 99016389		E	Burkholderia pseudomallei	Unknown	Clinical		Apichai Tuanyok, NAU, Arizona
MSHR0296		E	Burkholderia pseudomallei	Australia	Environmental		Bart J. Currie, Menzies School Health Research, Australia
MSHR0776		E	Burkholderia pseudomallei	Australia	Clinical		Bart J. Currie, Menzies School Health Research, Australia
Ubon_P19_Bp2		E	Burkholderia pseudomallei	Thailand	Clinical		Apichai Tuanyok, NAU, Arizona
2002721100	F3253, 141-82	G	Burkholderia pseudomallei	Puerto Rico	Clinical		Apichai Tuanyok, NAU, Arizona
2002721171	D4899, 412H	G	Burkholderia pseudomallei	Venezuela	Clinical		Apichai Tuanyok, NAU, Arizona
2002721183	7893, 720	G	Burkholderia pseudomallei	Ecuador	Animal		Apichai Tuanyok, NAU, Arizona
2002721184	7894, 1960	G	Burkholderia pseudomallei	Ecuador	Clinical		Apichai Tuanyok, NAU, Arizona
2002721691	green	GC	Burkholderia pseudomallei	Mauritius	Clinical		Apichai Tuanyok, NAU, Arizona
Pasteur #6068	2002721763	C	Burkholderia pseudomallei	Vietnam	Unknown	169	Mindy Glass, CDC, Atlanta
USAMRU Malaysia #12	2002721736	CE	Burkholderia pseudomallei	Malaysia	Unknown	54	Mindy Glass, CDC, Atlanta
Loei KK-S2	2002721798	C	Burkholderia pseudomallei	Thailand	Environmental	10	Mindy Glass, CDC, Atlanta
Loei KK-S2 (2)	2002721799	C	Burkholderia pseudomallei	Thailand	Environmental	10	Mindy Glass, CDC, Atlanta
Antigen 6066	2002721792	CE	Burkholderia pseudomallei	Unknown	Unknown	35	Mindy Glass, CDC, Atlanta
Pasteur #6606	2002721762	CE	Burkholderia pseudomallei	Vietnam	Unknown	35	Mindy Glass, CDC, Atlanta
Ranong 70 W	2002721697	C	Burkholderia pseudomallei	Thailand	Environmental	38	Mindy Glass, CDC, Atlanta
Antigen 13 smooth	2002721779	E	Burkholderia pseudomallei	Unknown	Unknown	46	Mindy Glass, CDC, Atlanta
Antigen 1691	2002721791	E	Burkholderia pseudomallei	Malaysia	Clinical	46	Mindy Glass, CDC, Atlanta
Antigen 25 donut	2002721780	E	Burkholderia pseudomallei	Malaysia	Unknown	46	Mindy Glass, CDC, Atlanta
Antigen 25 HP Trans-muc	2002721782	E	Burkholderia pseudomallei	Unknown	Unknown	46	Mindy Glass, CDC, Atlanta
Antigen 25 medusa	2002721781	E	Burkholderia pseudomallei	Malaysia	Unknown	46	Mindy Glass, CDC, Atlanta
Antigen 25 smooth	2002721778	E	Burkholderia pseudomallei	Malaysia	Unknown	46	Mindy Glass, CDC, Atlanta
Phuket 6 S-1	2002721702	E	Burkholderia pseudomallei	Thailand	Environmental	46	Mindy Glass, CDC, Atlanta
USAMRU Malaysia #11	2002721735	E	Burkholderia pseudomallei	Malaysia	Unknown	46	Mindy Glass, CDC, Atlanta
USAMRU Malaysia #29	2002721754	E	Burkholderia pseudomallei	Malaysia	Unknown	46	Mindy Glass, CDC, Atlanta
USAMRU Malaysia #30	2002721755	E	Burkholderia pseudomallei	Malaysia	Unknown	46	Mindy Glass, CDC, Atlanta
USAMRU Malaysia #32	2002721757	E	Burkholderia pseudomallei	Malaysia	Unknown	46	Mindy Glass, CDC, Atlanta
USAMRU Malaysia #5	2002721727	E	Burkholderia pseudomallei	Malaysia	Unknown	46	Mindy Glass, CDC, Atlanta
USAMRU Malaysia #7	2002721731	E	Burkholderia pseudomallei	Malaysia	Environmental	46	Mindy Glass, CDC, Atlanta
USAMRU Malaysia #8	2002721732	E	Burkholderia pseudomallei	Malaysia	Environmental	46	Mindy Glass, CDC, Atlanta
USAMRU Malaysia #10	2002721734	C	Burkholderia pseudomallei	Malaysia	Environmental	51	Mindy Glass, CDC, Atlanta
USAMRU Malaysia #27	2002721752	C	Burkholderia pseudomallei	Malaysia	Unknown	51	Mindy Glass, CDC, Atlanta
USAMRU Malaysia #31	2002721756	CE	Burkholderia pseudomallei	Malaysia	Unknown	51	Mindy Glass, CDC, Atlanta
WRAIR #294	2002721720	CE	Burkholderia pseudomallei	Malaysia	Unknown	51	Mindy Glass, CDC, Atlanta
Phuket 3 W-1	2002721700	CE	Burkholderia pseudomallei	Thailand	Environmental	54	Mindy Glass, CDC, Atlanta
UB-8-soil 2	2002721715	E	Burkholderia pseudomallei	Thailand	Environmental	60	Mindy Glass, CDC, Atlanta
Smith 002025	2002721772	C	Burkholderia pseudomallei	Unknown	Unknown	84	Mindy Glass, CDC, Atlanta
Songkhla 34 W-2	2002721712	CE	Burkholderia pseudomallei	Thailand	Environmental	84	Mindy Glass, CDC, Atlanta
STW 101-1	2002721786	CE	Burkholderia pseudomallei	Thailand	Environmental	84	Mindy Glass, CDC, Atlanta
STW 102-3	2002721787	CE	Burkholderia pseudomallei	Thailand	Environmental	84	Mindy Glass, CDC, Atlanta
STW 214	2002721785	CE	Burkholderia pseudomallei	Thailand	Environmental	84	Mindy Glass, CDC, Atlanta
STW 225-3	2002721784	CE	Burkholderia pseudomallei	Thailand	Environmental	84	Mindy Glass, CDC, Atlanta
STW 62	2002721789	CE	Burkholderia pseudomallei	Thailand	Environmental	84	Mindy Glass, CDC, Atlanta
STW 97-1	2002721788	CE	Burkholderia pseudomallei	Thailand	Environmental	84	Mindy Glass, CDC, Atlanta
USAMRU Malaysia #14	2002721738	CE	Burkholderia pseudomallei	Malaysia	Unknown	84	Mindy Glass, CDC, Atlanta
USAMRU Malaysia #15	2002721739	CE	Burkholderia pseudomallei	Malaysia	Unknown	84	Mindy Glass, CDC, Atlanta
USAMRU Malaysia #16	2002721740	CE	Burkholderia pseudomallei	Malaysia	Unknown	84	Mindy Glass, CDC, Atlanta
USAMRU Malaysia #17	2002721741	CE	Burkholderia pseudomallei	Malaysia	Unknown	84	Mindy Glass, CDC, Atlanta
Antigen 1188HP-R	2002721790	E	Burkholderia pseudomallei	Malaysia	Clinical	99	Mindy Glass, CDC, Atlanta
Smith 373	2002721770	E	Burkholderia pseudomallei	Unknown	Unknown	99	Mindy Glass, CDC, Atlanta
WRAIR #1188	2002721725	E	Burkholderia pseudomallei	Malaysia	Clinical	99	Mindy Glass, CDC, Atlanta
Phattalung 52 W-2	2002721690	C	Burkholderia pseudomallei	Thailand	Environmental	164	Mindy Glass, CDC, Atlanta
UB-8-soil 1	2002721714	E	Burkholderia pseudomallei	Thailand	Environmental	167	Mindy Glass, CDC, Atlanta
Songkhla 11 W	2002721703	E	Burkholderia pseudomallei	Thailand	Environmental	168	Mindy Glass, CDC, Atlanta
Lavict	2002721797	CE	Burkholderia pseudomallei	Vietnam	Clinical	211	Mindy Glass, CDC, Atlanta
Ramos	2002721696	CE	Burkholderia pseudomallei	Vietnam	Clinical	211	Mindy Glass, CDC, Atlanta
Smith 384	2002721768	CE	Burkholderia pseudomallei	Unknown	Unknown	211	Mindy Glass, CDC, Atlanta
Smith 660	2002721767	CE	Burkholderia pseudomallei	Unknown	Unknown	211	Mindy Glass, CDC, Atlanta
Ranong 73 W-2	2002721698	CE	Burkholderia pseudomallei	Thailand	Environmental	227	Mindy Glass, CDC, Atlanta
Songkhla 21 W-2	2002721705	E	Burkholderia pseudomallei	Thailand	Environmental	228	Mindy Glass, CDC, Atlanta
Phattalung 49 W-2	2002721766	CE	Burkholderia pseudomallei	Thailand	Environmental	289	Mindy Glass, CDC, Atlanta
Songkhla 21 W-1	2002721706	CE	Burkholderia pseudomallei	Thailand	Environmental	289	Mindy Glass, CDC, Atlanta
USAMRU Malaysia #28	2002721753	CE	Burkholderia pseudomallei	Malaysia	Unknown	289	Mindy Glass, CDC, Atlanta
Phattalung 49 W-1	2002721765	CE	Burkholderia pseudomallei	Thailand	Environmental	369	Mindy Glass, CDC, Atlanta
Phattalung 51 W	2002721695	E	Burkholderia pseudomallei	Thailand	Environmental	369	Mindy Glass, CDC, Atlanta
Songkhla 27 W-1	2002721709	E	Burkholderia pseudomallei	Thailand	Environmental	369	Mindy Glass, CDC, Atlanta
Songkhla 27 W-2	2002721710	E	Burkholderia pseudomallei	Thailand	Environmental	369	Mindy Glass, CDC, Atlanta
Pasteur #63503	2002721764	E	Burkholderia pseudomallei	Vietnam	Unknown	370	Mindy Glass, CDC, Atlanta
Ubol 6-1	2002721713	C	Burkholderia pseudomallei	Thailand	Environmental	373	Mindy Glass, CDC, Atlanta
Nakhon Phanom #32-3	2002721758	C	Burkholderia pseudomallei	Thailand	Environmental	375	Mindy Glass, CDC, Atlanta
Chumpnon 76-W-2	2002721794	C	Burkholderia pseudomallei	Thailand	Environmental	377	Mindy Glass, CDC, Atlanta
Songkhla 25 W-1	2002721707	G	Burkholderia pseudomallei	Thailand	Environmental	382	Mindy Glass, CDC, Atlanta
Songkhla 25 W-2	2002721708	G	Burkholderia pseudomallei	Thailand	Environmental	382	Mindy Glass, CDC, Atlanta
Smith 22294	2002721769	E	Burkholderia pseudomallei	Unknown	Unknown	387	Mindy Glass, CDC, Atlanta
Hansen	2002721795	C	Burkholderia pseudomallei	Vietnam	Clinical	397	Mindy Glass, CDC, Atlanta
Ranong 73 W-1	2002721699	E	Burkholderia pseudomallei	Thailand	Environmental	399	Mindy Glass, CDC, Atlanta
Smith 001963	2002721771	C	Burkholderia pseudomallei	Unknown	Unknown	403	Mindy Glass, CDC, Atlanta
Smith 002559	2002721774	C	Burkholderia pseudomallei	Unknown	Unknown	403	Mindy Glass, CDC, Atlanta
USAMRU Malaysia #19	2002721743	E	Burkholderia pseudomallei	Malaysia	Unknown	406	Mindy Glass, CDC, Atlanta
Ranong #8	2002721689	E	Burkholderia pseudomallei	Thailand	Environmental	409	Mindy Glass, CDC, Atlanta
Pasteur #52237	2002721761	E	Burkholderia pseudomallei	Vietnam	Unknown	411	Mindy Glass, CDC, Atlanta
Songkhla 34 W-1	2002721711	C	Burkholderia pseudomallei	Thailand	Environmental	414	Mindy Glass, CDC, Atlanta
Smith 002159	2002721773	CE	Burkholderia pseudomallei	Unknown	Unknown	419	Mindy Glass, CDC, Atlanta
Chumpnon 76-W-1	2002721793	C	Burkholderia pseudomallei	Thailand	Environmental		Mindy Glass, CDC, Atlanta
Songkhla 11 W-1	2002721704	C	Burkholderia pseudomallei	Thailand	Environmental		Mindy Glass, CDC, Atlanta
Whitmore '57	2002721776	C	Burkholderia pseudomallei	Unknown	Unknown		Mindy Glass, CDC, Atlanta
Whitmore '61	2002721777	C	Burkholderia pseudomallei	Unknown	Unknown		Mindy Glass, CDC, Atlanta
Infected Rat, VN	2002721719	CE	Burkholderia pseudomallei	Vietnam	Animal		Mindy Glass, CDC, Atlanta
33389	2002721775	E	Burkholderia pseudomallei	Unknown	Unknown		Mindy Glass, CDC, Atlanta
Antigen 1188 HP-S	2002721783	E	Burkholderia pseudomallei	Unknown	Unknown		Mindy Glass, CDC, Atlanta
Loei KK-W-5	2002721800	E	Burkholderia pseudomallei	Thailand	Environmental		Mindy Glass, CDC, Atlanta
Phattalung 52 W-1	2002721694	G	Burkholderia pseudomallei	Thailand	Environmental		Mindy Glass, CDC, Atlanta
2751a	2844	C	Burkholderia pseudomallei	Thailand	Clinical	9	Sharon Peacock, Bangkok, Thailand
2646a	2722	E	Burkholderia pseudomallei	Thailand	Clinical	17	Sharon Peacock, Bangkok, Thailand
2711a	2800	CE	Burkholderia pseudomallei	Thailand	Clinical	23	Sharon Peacock, Bangkok, Thailand
E0238		CE	Burkholderia pseudomallei	Thailand	Environmental	32	Sharon Peacock, Bangkok, Thailand
E0279		E	Burkholderia pseudomallei	Thailand	Environmental	33	Sharon Peacock, Bangkok, Thailand
2699a	2783	CE	Burkholderia pseudomallei	Thailand	Clinical	48	Sharon Peacock, Bangkok, Thailand
E0230		CE	Burkholderia pseudomallei	Thailand	Environmental	48	Sharon Peacock, Bangkok, Thailand
E0231		CE	Burkholderia pseudomallei	Thailand	Environmental	48	Sharon Peacock, Bangkok, Thailand
E0366		C	Burkholderia pseudomallei	Thailand	Environmental	50	Sharon Peacock, Bangkok, Thailand
E0388		CE	Burkholderia pseudomallei	Thailand	Environmental	51	Sharon Peacock, Bangkok, Thailand
2643a	2719	C	Burkholderia pseudomallei	Thailand	Clinical	52	Sharon Peacock, Bangkok, Thailand
E0339		CE	Burkholderia pseudomallei	Thailand	Environmental	52	Sharon Peacock, Bangkok, Thailand
E0399		C	Burkholderia pseudomallei	Thailand	Environmental	54	Sharon Peacock, Bangkok, Thailand
2660a	2743	CE	Burkholderia pseudomallei	Thailand	Clinical	54	Sharon Peacock, Bangkok, Thailand
E0021		CE	Burkholderia pseudomallei	Thailand	Environmental	54	Sharon Peacock, Bangkok, Thailand
E0235		CE	Burkholderia pseudomallei	Thailand	Environmental	54	Sharon Peacock, Bangkok, Thailand
2613a	2690	E	Burkholderia pseudomallei	Thailand	Clinical	54	Sharon Peacock, Bangkok, Thailand
E0037		E	Burkholderia pseudomallei	Thailand	Environmental	54	Sharon Peacock, Bangkok, Thailand
E0413		E	Burkholderia pseudomallei	Thailand	Environmental	54	Sharon Peacock, Bangkok, Thailand
2671a	2754	CE	Burkholderia pseudomallei	Thailand	Clinical	58	Sharon Peacock, Bangkok, Thailand
2692a	2780	CE	Burkholderia pseudomallei	Thailand	Clinical	58	Sharon Peacock, Bangkok, Thailand
2708a	2797	E	Burkholderia pseudomallei	Thailand	Clinical	60	Sharon Peacock, Bangkok, Thailand
E0013		E	Burkholderia pseudomallei	Thailand	Environmental	60	Sharon Peacock, Bangkok, Thailand
E0383		E	Burkholderia pseudomallei	Thailand	Environmental	60	Sharon Peacock, Bangkok, Thailand
2614a	2691	CE	Burkholderia pseudomallei	Thailand	Clinical	70	Sharon Peacock, Bangkok, Thailand
2693a	2781	CE	Burkholderia pseudomallei	Thailand	Clinical	70	Sharon Peacock, Bangkok, Thailand
2694a	2782	CE	Burkholderia pseudomallei	Thailand	Clinical	70	Sharon Peacock, Bangkok, Thailand
2684a	2771	E	Burkholderia pseudomallei	Thailand	Clinical	70	Sharon Peacock, Bangkok, Thailand
2689b	2778	E	Burkholderia pseudomallei	Thailand	Clinical	70	Sharon Peacock, Bangkok, Thailand
E0358		E	Burkholderia pseudomallei	Thailand	Environmental	70	Sharon Peacock, Bangkok, Thailand
E0016		E	Burkholderia pseudomallei	Thailand	Environmental	93	Sharon Peacock, Bangkok, Thailand
E0342		E	Burkholderia pseudomallei	Thailand	Environmental	93	Sharon Peacock, Bangkok, Thailand
E0040		E	Burkholderia pseudomallei	Thailand	Environmental	99	Sharon Peacock, Bangkok, Thailand
E0415		CE	Burkholderia pseudomallei	Thailand	Environmental	154	Sharon Peacock, Bangkok, Thailand
E0417		CE	Burkholderia pseudomallei	Thailand	Environmental	154	Sharon Peacock, Bangkok, Thailand
2756a	2849	E	Burkholderia pseudomallei	Thailand	Clinical	155	Sharon Peacock, Bangkok, Thailand
2623a	2700	CE	Burkholderia pseudomallei	Thailand	Clinical	156	Sharon Peacock, Bangkok, Thailand
2674a	2757	CE	Burkholderia pseudomallei	Thailand	Clinical	157	Sharon Peacock, Bangkok, Thailand
2640a	2716	E	Burkholderia pseudomallei	Thailand	Clinical	157	Sharon Peacock, Bangkok, Thailand
E0008		C	Burkholderia pseudomallei	Thailand	Environmental	158	Sharon Peacock, Bangkok, Thailand
E0356		CE	Burkholderia pseudomallei	Thailand	Environmental	159	Sharon Peacock, Bangkok, Thailand
2650a	2731	CE	Burkholderia pseudomallei	Thailand	Clinical	162	Sharon Peacock, Bangkok, Thailand
E0181		CE	Burkholderia pseudomallei	Thailand	Environmental	162	Sharon Peacock, Bangkok, Thailand
2648a	2726	E	Burkholderia pseudomallei	Thailand	Clinical	163	Sharon Peacock, Bangkok, Thailand
2727a	2818	E	Burkholderia pseudomallei	Thailand	Clinical	163	Sharon Peacock, Bangkok, Thailand
E0241		CE	Burkholderia pseudomallei	Thailand	Environmental	167	Sharon Peacock, Bangkok, Thailand
2624a	2701	E	Burkholderia pseudomallei	Thailand	Clinical	167	Sharon Peacock, Bangkok, Thailand
2673a	2756	E	Burkholderia pseudomallei	Thailand	Clinical	167	Sharon Peacock, Bangkok, Thailand
E0242		E	Burkholderia pseudomallei	Thailand	Environmental	167	Sharon Peacock, Bangkok, Thailand
2666a	2749	C	Burkholderia pseudomallei	Thailand	Clinical	168	Sharon Peacock, Bangkok, Thailand
2622c	2699	E	Burkholderia pseudomallei	Thailand	Clinical	172	Sharon Peacock, Bangkok, Thailand
2633a	2710	CE	Burkholderia pseudomallei	Thailand	Clinical	173	Sharon Peacock, Bangkok, Thailand
2682a	2772	C	Burkholderia pseudomallei	Thailand	Clinical	174	Sharon Peacock, Bangkok, Thailand
2652a	2733	CE	Burkholderia pseudomallei	Thailand	Clinical	174	Sharon Peacock, Bangkok, Thailand
2720a	2811	E	Burkholderia pseudomallei	Thailand	Clinical	174	Sharon Peacock, Bangkok, Thailand
2657a	2739	CE	Burkholderia pseudomallei	Thailand	Clinical	175	Sharon Peacock, Bangkok, Thailand
2665a	2748	E	Burkholderia pseudomallei	Thailand	Clinical	176	Sharon Peacock, Bangkok, Thailand
2676a	2759	CE	Burkholderia pseudomallei	Thailand	Clinical	177	Sharon Peacock, Bangkok, Thailand
2744a	2835	CE	Burkholderia pseudomallei	Thailand	Clinical	179	Sharon Peacock, Bangkok, Thailand
E0284		CE	Burkholderia pseudomallei	Thailand	Environmental	180	Sharon Peacock, Bangkok, Thailand
E0239		CE	Burkholderia pseudomallei	Thailand	Environmental	182	Sharon Peacock, Bangkok, Thailand
E0187		CE	Burkholderia pseudomallei	Thailand	Environmental	184	Sharon Peacock, Bangkok, Thailand
2741a	2830	CE	Burkholderia pseudomallei	Thailand	Clinical	186	Sharon Peacock, Bangkok, Thailand
E0373		CE	Burkholderia pseudomallei	Thailand	Environmental	187	Sharon Peacock, Bangkok, Thailand
E0009		E	Burkholderia pseudomallei	Thailand	Environmental	190	Sharon Peacock, Bangkok, Thailand
E0395		C	Burkholderia pseudomallei	Thailand	Environmental	191	Sharon Peacock, Bangkok, Thailand
E0186		CE	Burkholderia pseudomallei	Thailand	Environmental	193	Sharon Peacock, Bangkok, Thailand
E0019		C	Burkholderia pseudomallei	Thailand	Environmental	197	Sharon Peacock, Bangkok, Thailand
2733c	2823	CE	Burkholderia pseudomallei	Thailand	Clinical	198	Sharon Peacock, Bangkok, Thailand
2746b	2838	E	Burkholderia pseudomallei	Thailand	Clinical	199	Sharon Peacock, Bangkok, Thailand
E0240		CE	Burkholderia pseudomallei	Thailand	Environmental	200	Sharon Peacock, Bangkok, Thailand
E0419		C	Burkholderia pseudomallei	Thailand	Environmental	203	Sharon Peacock, Bangkok, Thailand
2718a	2809	CE	Burkholderia pseudomallei	Thailand	Clinical	205	Sharon Peacock, Bangkok, Thailand
2721a	2812	E	Burkholderia pseudomallei	Thailand	Clinical	205	Sharon Peacock, Bangkok, Thailand
E0372		E	Burkholderia pseudomallei	Thailand	Environmental	205	Sharon Peacock, Bangkok, Thailand
2639a	2715	CE	Burkholderia pseudomallei	Thailand	Clinical	207	Sharon Peacock, Bangkok, Thailand
2690a	2775	CE	Burkholderia pseudomallei	Thailand	Clinical	210	Sharon Peacock, Bangkok, Thailand
2651a	2732	CE	Burkholderia pseudomallei	Thailand	Clinical	213	Sharon Peacock, Bangkok, Thailand
2754a	2846	E	Burkholderia pseudomallei	Thailand	Clinical	214	Sharon Peacock, Bangkok, Thailand
E0396		C	Burkholderia pseudomallei	Thailand	Environmental	220	Sharon Peacock, Bangkok, Thailand
2617a	2694	CE	Burkholderia pseudomallei	Thailand	Clinical	221	Sharon Peacock, Bangkok, Thailand
E0010		E	Burkholderia pseudomallei	Thailand	Environmental	222	Sharon Peacock, Bangkok, Thailand
E0407		CE	Burkholderia pseudomallei	Thailand	Environmental	223	Sharon Peacock, Bangkok, Thailand
E0370		C	Burkholderia pseudomallei	Thailand	Environmental	224	Sharon Peacock, Bangkok, Thailand
E0387		CE	Burkholderia pseudomallei	Thailand	Environmental	163	Sharon Peacock, Bangkok, Thailand
1378a	1424	C	Burkholderia pseudomallei	Thailand	Clinical	23	Sharon Peacock, Bangkok, Thailand
2717a	2808	C	Burkholderia pseudomallei	Thailand	Clinical	33	Sharon Peacock, Bangkok, Thailand
1246a	1275	CE	Burkholderia pseudomallei	Thailand	Clinical	33	Sharon Peacock, Bangkok, Thailand
542a	418	CE	Burkholderia pseudomallei	Thailand	Clinical	33	Sharon Peacock, Bangkok, Thailand
1973a	2048	CE	Burkholderia pseudomallei	Thailand	Clinical	34	Sharon Peacock, Bangkok, Thailand
2206a	2271	CE	Burkholderia pseudomallei	Thailand	Clinical	34	Sharon Peacock, Bangkok, Thailand
710a	652	CE	Burkholderia pseudomallei	Thailand	Clinical	34	Sharon Peacock, Bangkok, Thailand
759a	739	CE	Burkholderia pseudomallei	Thailand	Clinical	34	Sharon Peacock, Bangkok, Thailand
811a	800	CE	Burkholderia pseudomallei	Thailand	Clinical	34	Sharon Peacock, Bangkok, Thailand
2843a	2942	E	Burkholderia pseudomallei	Thailand	Clinical	47	Sharon Peacock, Bangkok, Thailand
800a	788	E	Burkholderia pseudomallei	Thailand	Clinical	48	Sharon Peacock, Bangkok, Thailand
2516a	2590	E	Burkholderia pseudomallei	Thailand	Clinical	50	Sharon Peacock, Bangkok, Thailand
E0389		C	Burkholderia pseudomallei	Thailand	Environmental	51	Sharon Peacock, Bangkok, Thailand
1882a	1960	E	Burkholderia pseudomallei	Thailand	Clinical	54	Sharon Peacock, Bangkok, Thailand
2659a	2740	E	Burkholderia pseudomallei	Thailand	Clinical	54	Sharon Peacock, Bangkok, Thailand
2086a	2159	E	Burkholderia pseudomallei	Thailand	Clinical	56	Sharon Peacock, Bangkok, Thailand
2506a	2579	CE	Burkholderia pseudomallei	Thailand	Clinical	58	Sharon Peacock, Bangkok, Thailand
2855a	2953	CE	Burkholderia pseudomallei	Thailand	Clinical	58	Sharon Peacock, Bangkok, Thailand
2873a	2980	CE	Burkholderia pseudomallei	Thailand	Clinical	58	Sharon Peacock, Bangkok, Thailand
532a	405	CE	Burkholderia pseudomallei	Thailand	Clinical	58	Sharon Peacock, Bangkok, Thailand
972a	1002	CE	Burkholderia pseudomallei	Thailand	Clinical	58	Sharon Peacock, Bangkok, Thailand
2147a	2218	E	Burkholderia pseudomallei	Thailand	Clinical	58	Sharon Peacock, Bangkok, Thailand
863a	861	E	Burkholderia pseudomallei	Thailand	Clinical	58	Sharon Peacock, Bangkok, Thailand
1244a	1272	E	Burkholderia pseudomallei	Thailand	Clinical	60	Sharon Peacock, Bangkok, Thailand
1248a	1278	E	Burkholderia pseudomallei	Thailand	Clinical	60	Sharon Peacock, Bangkok, Thailand
2820a	2913	E	Burkholderia pseudomallei	Thailand	Clinical	60	Sharon Peacock, Bangkok, Thailand
1794a	1869	CE	Burkholderia pseudomallei	Thailand	Clinical	70	Sharon Peacock, Bangkok, Thailand
1814a	1889	CE	Burkholderia pseudomallei	Thailand	Clinical	70	Sharon Peacock, Bangkok, Thailand
2454a	2524	CE	Burkholderia pseudomallei	Thailand	Clinical	70	Sharon Peacock, Bangkok, Thailand
2664b	2747	CE	Burkholderia pseudomallei	Thailand	Clinical	70	Sharon Peacock, Bangkok, Thailand
2677a	2761	CE	Burkholderia pseudomallei	Thailand	Clinical	70	Sharon Peacock, Bangkok, Thailand
2747a	2839	CE	Burkholderia pseudomallei	Thailand	Clinical	70	Sharon Peacock, Bangkok, Thailand
1045a	1084	CE	Burkholderia pseudomallei	Thailand	Clinical	153	Sharon Peacock, Bangkok, Thailand
1050a	1089	CE	Burkholderia pseudomallei	Thailand	Clinical	154	Sharon Peacock, Bangkok, Thailand
E0406		CE	Burkholderia pseudomallei	Thailand	Environmental	161	Sharon Peacock, Bangkok, Thailand
1076a	1117	E	Burkholderia pseudomallei	Thailand	Clinical	162	Sharon Peacock, Bangkok, Thailand
1970a	2046	E	Burkholderia pseudomallei	Thailand	Clinical	162	Sharon Peacock, Bangkok, Thailand
E0034		E	Burkholderia pseudomallei	Thailand	Environmental	162	Sharon Peacock, Bangkok, Thailand
E0394		C	Burkholderia pseudomallei	Thailand	Environmental	164	Sharon Peacock, Bangkok, Thailand
1257a	1288	E	Burkholderia pseudomallei	Thailand	Clinical	167	Sharon Peacock, Bangkok, Thailand
1943a	2018	E	Burkholderia pseudomallei	Thailand	Clinical	167	Sharon Peacock, Bangkok, Thailand
2427a	2497	E	Burkholderia pseudomallei	Thailand	Clinical	167	Sharon Peacock, Bangkok, Thailand
587a	485	E	Burkholderia pseudomallei	Thailand	Clinical	167	Sharon Peacock, Bangkok, Thailand
876a	877	E	Burkholderia pseudomallei	Thailand	Clinical	167	Sharon Peacock, Bangkok, Thailand
924a	943	E	Burkholderia pseudomallei	Thailand	Clinical	167	Sharon Peacock, Bangkok, Thailand
2609a	2687	E	Burkholderia pseudomallei	Thailand	Clinical	171	Sharon Peacock, Bangkok, Thailand
520a	393	CE	Burkholderia pseudomallei	Thailand	Clinical	174	Sharon Peacock, Bangkok, Thailand
878a	878	CE	Burkholderia pseudomallei	Thailand	Clinical	174	Sharon Peacock, Bangkok, Thailand
1147a	1191	E	Burkholderia pseudomallei	Thailand	Clinical	176	Sharon Peacock, Bangkok, Thailand
2808a	2901	E	Burkholderia pseudomallei	Thailand	Clinical	176	Sharon Peacock, Bangkok, Thailand
1807a	1882	CE	Burkholderia pseudomallei	Thailand	Clinical	177	Sharon Peacock, Bangkok, Thailand
799a	787	CE	Burkholderia pseudomallei	Thailand	Clinical	177	Sharon Peacock, Bangkok, Thailand
873a	872	E	Burkholderia pseudomallei	Thailand	Clinical	178	Sharon Peacock, Bangkok, Thailand
E0412		C	Burkholderia pseudomallei	Thailand	Environmental	183	Sharon Peacock, Bangkok, Thailand
E0401		CE	Burkholderia pseudomallei	Thailand	Environmental	188	Sharon Peacock, Bangkok, Thailand
2729a	2819	E	Burkholderia pseudomallei	Thailand	Clinical	192	Sharon Peacock, Bangkok, Thailand
653a	568	C	Burkholderia pseudomallei	Thailand	Clinical	197	Sharon Peacock, Bangkok, Thailand
E0379		CE	Burkholderia pseudomallei	Thailand	Environmental	201	Sharon Peacock, Bangkok, Thailand
508a	382	E	Burkholderia pseudomallei	Thailand	Clinical	202	Sharon Peacock, Bangkok, Thailand
2167a	2235	E	Burkholderia pseudomallei	Thailand	Clinical	205	Sharon Peacock, Bangkok, Thailand
814a	803	E	Burkholderia pseudomallei	Thailand	Clinical	205	Sharon Peacock, Bangkok, Thailand
1455a	1511	CE	Burkholderia pseudomallei	Thailand	Clinical	206	Sharon Peacock, Bangkok, Thailand
1204a	1238	C	Burkholderia pseudomallei	Thailand	Clinical	221	Sharon Peacock, Bangkok, Thailand
1255a	1283	C	Burkholderia pseudomallei	Thailand	Clinical	221	Sharon Peacock, Bangkok, Thailand
1018a	1056	CE	Burkholderia pseudomallei	Thailand	Clinical	221	Sharon Peacock, Bangkok, Thailand
2679a	2764	E	Burkholderia pseudomallei	Thailand	Clinical	221	Sharon Peacock, Bangkok, Thailand
1214a	1248	C	Burkholderia pseudomallei	Thailand	Clinical	298	Sharon Peacock, Bangkok, Thailand
655a	572	CE	Burkholderia pseudomallei	Thailand	Clinical	299	Sharon Peacock, Bangkok, Thailand
2510a	2583	C	Burkholderia pseudomallei	Thailand	Clinical	300	Sharon Peacock, Bangkok, Thailand
1773a	1848	E	Burkholderia pseudomallei	Thailand	Clinical	301	Sharon Peacock, Bangkok, Thailand
1225a	1255	CE	Burkholderia pseudomallei	Thailand	Clinical	302	Sharon Peacock, Bangkok, Thailand
1588a	1658	C	Burkholderia pseudomallei	Thailand	Clinical	303	Sharon Peacock, Bangkok, Thailand
2406a	2476	CE	Burkholderia pseudomallei	Thailand	Clinical	304	Sharon Peacock, Bangkok, Thailand
616a	588	CE	Burkholderia pseudomallei	Thailand	Clinical	304	Sharon Peacock, Bangkok, Thailand
828a	820	C	Burkholderia pseudomallei	Thailand	Clinical	306	Sharon Peacock, Bangkok, Thailand
666a	601	CE	Burkholderia pseudomallei	Thailand	Clinical	307	Sharon Peacock, Bangkok, Thailand
529a	402	C	Burkholderia pseudomallei	Thailand	Clinical	308	Sharon Peacock, Bangkok, Thailand
995a	1029	CE	Burkholderia pseudomallei	Thailand	Clinical	309	Sharon Peacock, Bangkok, Thailand
557a	443	C	Burkholderia pseudomallei	Thailand	Clinical	310	Sharon Peacock, Bangkok, Thailand
1103a	1144	CE	Burkholderia pseudomallei	Thailand	Clinical	311	Sharon Peacock, Bangkok, Thailand
1842a	1919	E	Burkholderia pseudomallei	Thailand	Clinical	312	Sharon Peacock, Bangkok, Thailand
1381a	1426	E	Burkholderia pseudomallei	Thailand	Clinical	313	Sharon Peacock, Bangkok, Thailand
955a	979	CE	Burkholderia pseudomallei	Thailand	Clinical	314	Sharon Peacock, Bangkok, Thailand
2834a	2929	CE	Burkholderia pseudomallei	Thailand	Clinical	315	Sharon Peacock, Bangkok, Thailand
2833a	2928	C	Burkholderia pseudomallei	Thailand	Clinical	316	Sharon Peacock, Bangkok, Thailand
1426a	1479	C	Burkholderia pseudomallei	Thailand	Clinical	317	Sharon Peacock, Bangkok, Thailand
2661a	2744	C	Burkholderia pseudomallei	Thailand	Clinical	33	Sharon Peacock, Bangkok, Thailand
E0361		E	Burkholderia pseudomallei	Thailand	Environmental	230	Sharon Peacock, Bangkok, Thailand
2687a	2774	E	Burkholderia pseudomallei	Thailand	Clinical	10	Sharon Peacock, Bangkok, Thailand
2618a	2695	CE	Burkholderia pseudomallei	Thailand	Clinical	16	Sharon Peacock, Bangkok, Thailand
2776a	2869	E	Burkholderia pseudomallei	Thailand	Clinical	16	Sharon Peacock, Bangkok, Thailand
2762a	2855	C	Burkholderia pseudomallei	Thailand	Clinical	23	Sharon Peacock, Bangkok, Thailand
E0268		CE	Burkholderia pseudomallei	Thailand	Environmental	23	Sharon Peacock, Bangkok, Thailand
2769a	2862	CE	Burkholderia pseudomallei	Thailand	Clinical	33	Sharon Peacock, Bangkok, Thailand
2698a	2786	CE	Burkholderia pseudomallei	Thailand	Clinical	34	Sharon Peacock, Bangkok, Thailand
2704a	2793	CE	Burkholderia pseudomallei	Thailand	Clinical	34	Sharon Peacock, Bangkok, Thailand
E0237		CE	Burkholderia pseudomallei	Thailand	Environmental	34	Sharon Peacock, Bangkok, Thailand
2641a	2717	CE	Burkholderia pseudomallei	Thailand	Clinical	46	Sharon Peacock, Bangkok, Thailand
2628a	2705	C	Burkholderia pseudomallei	Thailand	Clinical	47	Sharon Peacock, Bangkok, Thailand
2719a	2810	E	Burkholderia pseudomallei	Thailand	Clinical	48	Sharon Peacock, Bangkok, Thailand
E0377		CE	Burkholderia pseudomallei	Thailand	Environmental	50	Sharon Peacock, Bangkok, Thailand
2668a	2751	E	Burkholderia pseudomallei	Thailand	Clinical	50	Sharon Peacock, Bangkok, Thailand
2670a	2753	CE	Burkholderia pseudomallei	Thailand	Clinical	54	Sharon Peacock, Bangkok, Thailand
E0024		E	Burkholderia pseudomallei	Thailand	Environmental	54	Sharon Peacock, Bangkok, Thailand
E0411		E	Burkholderia pseudomallei	Thailand	Environmental	54	Sharon Peacock, Bangkok, Thailand
E0344		E	Burkholderia pseudomallei	Thailand	Environmental	56	Sharon Peacock, Bangkok, Thailand
2667a	2750	CE	Burkholderia pseudomallei	Thailand	Clinical	58	Sharon Peacock, Bangkok, Thailand
E0378		E	Burkholderia pseudomallei	Thailand	Environmental	60	Sharon Peacock, Bangkok, Thailand
E0351		CE	Burkholderia pseudomallei	Thailand	Environmental	68	Sharon Peacock, Bangkok, Thailand
2616a	2693	E	Burkholderia pseudomallei	Thailand	Clinical	68	Sharon Peacock, Bangkok, Thailand
E0371		C	Burkholderia pseudomallei	Thailand	Environmental	70	Sharon Peacock, Bangkok, Thailand
2663a	2746	CE	Burkholderia pseudomallei	Thailand	Clinical	70	Sharon Peacock, Bangkok, Thailand
2644a	2720	E	Burkholderia pseudomallei	Thailand	Clinical	70	Sharon Peacock, Bangkok, Thailand
E0038		E	Burkholderia pseudomallei	Thailand	Environmental	70	Sharon Peacock, Bangkok, Thailand
E0359		E	Burkholderia pseudomallei	Thailand	Environmental	70	Sharon Peacock, Bangkok, Thailand
E0400		CE	Burkholderia pseudomallei	Thailand	Environmental	93	Sharon Peacock, Bangkok, Thailand
E0408		E	Burkholderia pseudomallei	Thailand	Environmental	152	Sharon Peacock, Bangkok, Thailand
2700a	2788	CE	Burkholderia pseudomallei	Thailand	Clinical	153	Sharon Peacock, Bangkok, Thailand
2740a	2825	CE	Burkholderia pseudomallei	Thailand	Clinical	157	Sharon Peacock, Bangkok, Thailand
2648b	2726	E	Burkholderia pseudomallei	Thailand	Clinical	163	Sharon Peacock, Bangkok, Thailand
2726a	2817	E	Burkholderia pseudomallei	Thailand	Clinical	165	Sharon Peacock, Bangkok, Thailand
E0385		CE	Burkholderia pseudomallei	Thailand	Environmental	166	Sharon Peacock, Bangkok, Thailand
2767a	2860	C	Burkholderia pseudomallei	Thailand	Clinical	167	Sharon Peacock, Bangkok, Thailand
2619a	2696	CE	Burkholderia pseudomallei	Thailand	Clinical	167	Sharon Peacock, Bangkok, Thailand
2626a	2703	CE	Burkholderia pseudomallei	Thailand	Clinical	167	Sharon Peacock, Bangkok, Thailand
2685a	2766	E	Burkholderia pseudomallei	Thailand	Clinical	167	Sharon Peacock, Bangkok, Thailand
2725b	2816	E	Burkholderia pseudomallei	Thailand	Clinical	167	Sharon Peacock, Bangkok, Thailand
E0233		C	Burkholderia pseudomallei	Thailand	Environmental	168	Sharon Peacock, Bangkok, Thailand
2770a	2863	CE	Burkholderia pseudomallei	Thailand	Clinical	169	Sharon Peacock, Bangkok, Thailand
2753a	2847	C	Burkholderia pseudomallei	Thailand	Clinical	170	Sharon Peacock, Bangkok, Thailand
2774a	2867	E	Burkholderia pseudomallei	Thailand	Clinical	174	Sharon Peacock, Bangkok, Thailand
2637a	2713	E	Burkholderia pseudomallei	Thailand	Clinical	176	Sharon Peacock, Bangkok, Thailand
2712a	2802	E	Burkholderia pseudomallei	Thailand	Clinical	178	Sharon Peacock, Bangkok, Thailand
E0409		E	Burkholderia pseudomallei	Thailand	Environmental	181	Sharon Peacock, Bangkok, Thailand
2688a	2776	CE	Burkholderia pseudomallei	Thailand	Clinical	185	Sharon Peacock, Bangkok, Thailand
2732a	2821	E	Burkholderia pseudomallei	Thailand	Clinical	195	Sharon Peacock, Bangkok, Thailand
2701a	2791	CE	Burkholderia pseudomallei	Thailand	Clinical	197	Sharon Peacock, Bangkok, Thailand
2691a	2779	E	Burkholderia pseudomallei	Thailand	Clinical	202	Sharon Peacock, Bangkok, Thailand
2773a	2866	E	Burkholderia pseudomallei	Thailand	Clinical	203	Sharon Peacock, Bangkok, Thailand
2713a	2803	E	Burkholderia pseudomallei	Thailand	Clinical	204	Sharon Peacock, Bangkok, Thailand
E0393		CE	Burkholderia pseudomallei	Thailand	Environmental	205	Sharon Peacock, Bangkok, Thailand
E0345		CE	Burkholderia pseudomallei	Thailand	Environmental	206	Sharon Peacock, Bangkok, Thailand
2678a	2763	CE	Burkholderia pseudomallei	Thailand	Clinical	208	Sharon Peacock, Bangkok, Thailand
E0405		E	Burkholderia pseudomallei	Thailand	Environmental	208	Sharon Peacock, Bangkok, Thailand
E0183		C	Burkholderia pseudomallei	Thailand	Environmental	209	Sharon Peacock, Bangkok, Thailand
2703a	2789	C	Burkholderia pseudomallei	Thailand	Clinical	211	Sharon Peacock, Bangkok, Thailand
2654a	2735	CE	Burkholderia pseudomallei	Thailand	Clinical	212	Sharon Peacock, Bangkok, Thailand
E0384		C	Burkholderia pseudomallei	Thailand	Environmental	215	Sharon Peacock, Bangkok, Thailand
2627a	2704	CE	Burkholderia pseudomallei	Thailand	Clinical	216	Sharon Peacock, Bangkok, Thailand
E0300		C	Burkholderia pseudomallei	Thailand	Environmental	217	Sharon Peacock, Bangkok, Thailand
E0420		E	Burkholderia pseudomallei	Thailand	Environmental	218	Sharon Peacock, Bangkok, Thailand
2649a	2729	C	Burkholderia pseudomallei	Thailand	Clinical	219	Sharon Peacock, Bangkok, Thailand
E0382		CE	Burkholderia pseudomallei	Thailand	Environmental	219	Sharon Peacock, Bangkok, Thailand
E0302		CE	Burkholderia pseudomallei	Thailand	Environmental	226	Sharon Peacock, Bangkok, Thailand
2615a	2692	CE	Burkholderia pseudomallei	Thailand	Clinical	227	Sharon Peacock, Bangkok, Thailand
2758a	2851	CE	Burkholderia pseudomallei	Thailand	Clinical	228	Sharon Peacock, Bangkok, Thailand
2632a	2709	CE	Burkholderia pseudomallei	Thailand	Clinical	229	Sharon Peacock, Bangkok, Thailand
E0012		CE	Burkholderia pseudomallei	Thailand	Environmental	231	Sharon Peacock, Bangkok, Thailand
E0362		E	Burkholderia pseudomallei	Thailand	Environmental	232	Sharon Peacock, Bangkok, Thailand
2743a	2832	C	Burkholderia pseudomallei	Thailand	Clinical	233	Sharon Peacock, Bangkok, Thailand
NRF60-Bp25		C	Burkholderia pseudomallei	Thailand	Environmental		Apichai Tuanyok, NAU, Arizona
NRF60-Bp47		C	Burkholderia pseudomallei	Thailand	Environmental		Apichai Tuanyok, NAU, Arizona
RF48-Bp5		C	Burkholderia pseudomallei	Thailand	Environmental		Apichai Tuanyok, NAU, Arizona
RF49-Bp2		C	Burkholderia pseudomallei	Thailand	Environmental		Apichai Tuanyok, NAU, Arizona
RF49-Bp7		C	Burkholderia pseudomallei	Thailand	Environmental		Apichai Tuanyok, NAU, Arizona
RF49-Bp9		C	Burkholderia pseudomallei	Thailand	Environmental		Apichai Tuanyok, NAU, Arizona
RF4-Bp117		C	Burkholderia pseudomallei	Thailand	Environmental		Apichai Tuanyok, NAU, Arizona
RF4-Bp80		C	Burkholderia pseudomallei	Thailand	Environmental		Apichai Tuanyok, NAU, Arizona
RF61-Bp1		C	Burkholderia pseudomallei	Thailand	Environmental		Apichai Tuanyok, NAU, Arizona
RF61-Bp2		C	Burkholderia pseudomallei	Thailand	Environmental		Apichai Tuanyok, NAU, Arizona
RF63-Bp1		C	Burkholderia pseudomallei	Thailand	Environmental		Apichai Tuanyok, NAU, Arizona
RF63-Bp3		C	Burkholderia pseudomallei	Thailand	Environmental		Apichai Tuanyok, NAU, Arizona
RF64-Bp32		C	Burkholderia pseudomallei	Thailand	Environmental		Apichai Tuanyok, NAU, Arizona
RF64-Bp73		C	Burkholderia pseudomallei	Thailand	Environmental		Apichai Tuanyok, NAU, Arizona
RF65-Bp2		C	Burkholderia pseudomallei	Thailand	Environmental		Apichai Tuanyok, NAU, Arizona
RF67-Bp10		C	Burkholderia pseudomallei	Thailand	Environmental		Apichai Tuanyok, NAU, Arizona
RF67-Bp3		C	Burkholderia pseudomallei	Thailand	Environmental		Apichai Tuanyok, NAU, Arizona
RF67-Bp6		C	Burkholderia pseudomallei	Thailand	Environmental		Apichai Tuanyok, NAU, Arizona
RF68-Bp12		C	Burkholderia pseudomallei	Thailand	Environmental		Apichai Tuanyok, NAU, Arizona
RF68-Bp5		C	Burkholderia pseudomallei	Thailand	Environmental		Apichai Tuanyok, NAU, Arizona
RF68-Bp7		C	Burkholderia pseudomallei	Thailand	Environmental		Apichai Tuanyok, NAU, Arizona
RF69-Bp10		C	Burkholderia pseudomallei	Thailand	Environmental		Apichai Tuanyok, NAU, Arizona
RF-sub80-Bp1		C	Burkholderia pseudomallei	Thailand	Environmental		Apichai Tuanyok, NAU, Arizona
NRF51-Bp1		CE	Burkholderia pseudomallei	Thailand	Environmental		Apichai Tuanyok, NAU, Arizona
NRF54-Bp1		CE	Burkholderia pseudomallei	Thailand	Environmental		Apichai Tuanyok, NAU, Arizona
NRF56-Bp1		CE	Burkholderia pseudomallei	Thailand	Environmental		Apichai Tuanyok, NAU, Arizona
NRF56-Bp2		CE	Burkholderia pseudomallei	Thailand	Environmental		Apichai Tuanyok, NAU, Arizona
NRF57-Bp16		CE	Burkholderia pseudomallei	Thailand	Environmental		Apichai Tuanyok, NAU, Arizona
NRF60-Bp1		CE	Burkholderia pseudomallei	Thailand	Environmental		Apichai Tuanyok, NAU, Arizona
NRF60-Bp16		CE	Burkholderia pseudomallei	Thailand	Environmental		Apichai Tuanyok, NAU, Arizona
RF44-Bp11		CE	Burkholderia pseudomallei	Thailand	Environmental		Apichai Tuanyok, NAU, Arizona
RF44-Bp24		CE	Burkholderia pseudomallei	Thailand	Environmental		Apichai Tuanyok, NAU, Arizona
RF44-Bp52		CE	Burkholderia pseudomallei	Thailand	Environmental		Apichai Tuanyok, NAU, Arizona
RF48-Bp3		CE	Burkholderia pseudomallei	Thailand	Environmental		Apichai Tuanyok, NAU, Arizona
RF48-Bp4		CE	Burkholderia pseudomallei	Thailand	Environmental		Apichai Tuanyok, NAU, Arizona
RF62-Bp22		CE	Burkholderia pseudomallei	Thailand	Environmental		Apichai Tuanyok, NAU, Arizona
RF62-Bp38		CE	Burkholderia pseudomallei	Thailand	Environmental		Apichai Tuanyok, NAU, Arizona
RF64-Bp11		CE	Burkholderia pseudomallei	Thailand	Environmental		Apichai Tuanyok, NAU, Arizona
RF65-Bp4		CE	Burkholderia pseudomallei	Thailand	Environmental		Apichai Tuanyok, NAU, Arizona
RF66-Bp1		CE	Burkholderia pseudomallei	Thailand	Environmental		Apichai Tuanyok, NAU, Arizona
RF66-Bp10		CE	Burkholderia pseudomallei	Thailand	Environmental		Apichai Tuanyok, NAU, Arizona
RF66-Bp4		CE	Burkholderia pseudomallei	Thailand	Environmental		Apichai Tuanyok, NAU, Arizona
RF66-Bp7		CE	Burkholderia pseudomallei	Thailand	Environmental		Apichai Tuanyok, NAU, Arizona
RF67-Bp1		CE	Burkholderia pseudomallei	Thailand	Environmental		Apichai Tuanyok, NAU, Arizona
RF68-Bp10		CE	Burkholderia pseudomallei	Thailand	Environmental		Apichai Tuanyok, NAU, Arizona
RF69-Bp2		CE	Burkholderia pseudomallei	Thailand	Environmental		Apichai Tuanyok, NAU, Arizona
RF69-Bp4		CE	Burkholderia pseudomallei	Thailand	Environmental		Apichai Tuanyok, NAU, Arizona
RF69-Bp7		CE	Burkholderia pseudomallei	Thailand	Environmental		Apichai Tuanyok, NAU, Arizona
RF70-Bp3		CE	Burkholderia pseudomallei	Thailand	Environmental		Apichai Tuanyok, NAU, Arizona
RF70-Bp4		CE	Burkholderia pseudomallei	Thailand	Environmental		Apichai Tuanyok, NAU, Arizona
RF70-Bp5		CE	Burkholderia pseudomallei	Thailand	Environmental		Apichai Tuanyok, NAU, Arizona
RF7-Bp1		CE	Burkholderia pseudomallei	Thailand	Environmental		Apichai Tuanyok, NAU, Arizona
RF-sub80-Bp2		CE	Burkholderia pseudomallei	Thailand	Environmental		Apichai Tuanyok, NAU, Arizona
NRF57-Bp24		E	Burkholderia pseudomallei	Thailand	Environmental		Apichai Tuanyok, NAU, Arizona
NRF57-Bp27		E	Burkholderia pseudomallei	Thailand	Environmental		Apichai Tuanyok, NAU, Arizona
NRF57-Bp4		E	Burkholderia pseudomallei	Thailand	Environmental		Apichai Tuanyok, NAU, Arizona
RF43-Bp11		E	Burkholderia pseudomallei	Thailand	Environmental		Apichai Tuanyok, NAU, Arizona
RF43-Bp22		E	Burkholderia pseudomallei	Thailand	Environmental		Apichai Tuanyok, NAU, Arizona
RF43-Bp38		E	Burkholderia pseudomallei	Thailand	Environmental		Apichai Tuanyok, NAU, Arizona
RF43-Bp4		E	Burkholderia pseudomallei	Thailand	Environmental		Apichai Tuanyok, NAU, Arizona
RF44-Bp38		E	Burkholderia pseudomallei	Thailand	Environmental		Apichai Tuanyok, NAU, Arizona
RF44-Bp6		E	Burkholderia pseudomallei	Thailand	Environmental		Apichai Tuanyok, NAU, Arizona
RF49-Bp4		E	Burkholderia pseudomallei	Thailand	Environmental		Apichai Tuanyok, NAU, Arizona
RF49-Bp5		E	Burkholderia pseudomallei	Thailand	Environmental		Apichai Tuanyok, NAU, Arizona
RF65-Bp12		E	Burkholderia pseudomallei	Thailand	Environmental		Apichai Tuanyok, NAU, Arizona
RF65-Bp5		E	Burkholderia pseudomallei	Thailand	Environmental		Apichai Tuanyok, NAU, Arizona
RF65-Bp8		E	Burkholderia pseudomallei	Thailand	Environmental		Apichai Tuanyok, NAU, Arizona
RF6-Bp15		E	Burkholderia pseudomallei	Thailand	Environmental		Apichai Tuanyok, NAU, Arizona
RF6-Bp19		E	Burkholderia pseudomallei	Thailand	Environmental		Apichai Tuanyok, NAU, Arizona
RF6-Bp2		E	Burkholderia pseudomallei	Thailand	Environmental		Apichai Tuanyok, NAU, Arizona
RF6-Bp26		E	Burkholderia pseudomallei	Thailand	Environmental		Apichai Tuanyok, NAU, Arizona
RF6-Bp8		E	Burkholderia pseudomallei	Thailand	Environmental		Apichai Tuanyok, NAU, Arizona
RF7-nonBp9		E	Burkholderia pseudomallei	Thailand	Environmental		Apichai Tuanyok, NAU, Arizona
RF8-Bp2		E	Burkholderia pseudomallei	Thailand	Environmental		Apichai Tuanyok, NAU, Arizona
RF8-Bp5		E	Burkholderia pseudomallei	Thailand	Environmental		Apichai Tuanyok, NAU, Arizona
RF-sub79-Bp1		E	Burkholderia pseudomallei	Thailand	Environmental		Apichai Tuanyok, NAU, Arizona
RF-sub79-Bp12		E	Burkholderia pseudomallei	Thailand	Environmental		Apichai Tuanyok, NAU, Arizona
RF-sub79-Bp17		E	Burkholderia pseudomallei	Thailand	Environmental		Apichai Tuanyok, NAU, Arizona
RF-sub79-Bp7		E	Burkholderia pseudomallei	Thailand	Environmental		Apichai Tuanyok, NAU, Arizona
Int13-Bp146		C	Burkholderia pseudomallei	Thailand	Environmental		Apichai Tuanyok, NAU, Arizona
Int23-Bp11		C	Burkholderia pseudomallei	Thailand	Environmental		Apichai Tuanyok, NAU, Arizona
Int23-Bp94		C	Burkholderia pseudomallei	Thailand	Environmental		Apichai Tuanyok, NAU, Arizona
Int24-Bp80		C	Burkholderia pseudomallei	Thailand	Environmental		Apichai Tuanyok, NAU, Arizona
Int25-Bp20		C	Burkholderia pseudomallei	Thailand	Environmental		Apichai Tuanyok, NAU, Arizona
Int25-Bp23		C	Burkholderia pseudomallei	Thailand	Environmental		Apichai Tuanyok, NAU, Arizona
NRF73-Bp1		C	Burkholderia pseudomallei	Thailand	Environmental		Apichai Tuanyok, NAU, Arizona
NRF73-Bp2		C	Burkholderia pseudomallei	Thailand	Environmental		Apichai Tuanyok, NAU, Arizona
NRF73-Bp3		C	Burkholderia pseudomallei	Thailand	Environmental		Apichai Tuanyok, NAU, Arizona
NRF77-Bp1		C	Burkholderia pseudomallei	Thailand	Environmental		Apichai Tuanyok, NAU, Arizona
NRF77-Bp3		C	Burkholderia pseudomallei	Thailand	Environmental		Apichai Tuanyok, NAU, Arizona
RF85_Bp37		C	Burkholderia pseudomallei	Thailand	Environmental		Apichai Tuanyok, NAU, Arizona
Int13-Bp114		CE	Burkholderia pseudomallei	Thailand	Environmental		Apichai Tuanyok, NAU, Arizona
Int7-Bp1		CE	Burkholderia pseudomallei	Thailand	Environmental		Apichai Tuanyok, NAU, Arizona
Int7-Bp2		CE	Burkholderia pseudomallei	Thailand	Environmental		Apichai Tuanyok, NAU, Arizona
Int7-Bp3e		CE	Burkholderia pseudomallei	Thailand	Environmental		Apichai Tuanyok, NAU, Arizona
NRF99-Bp13		CE	Burkholderia pseudomallei	Thailand	Environmental		Apichai Tuanyok, NAU, Arizona
NRF99-Bp3		CE	Burkholderia pseudomallei	Thailand	Environmental		Apichai Tuanyok, NAU, Arizona
NRF99-Bp31		CE	Burkholderia pseudomallei	Thailand	Environmental		Apichai Tuanyok, NAU, Arizona
NRF99-Bp35		CE	Burkholderia pseudomallei	Thailand	Environmental		Apichai Tuanyok, NAU, Arizona
RF85-Bp10		CE	Burkholderia pseudomallei	Thailand	Environmental		Apichai Tuanyok, NAU, Arizona
RF85-Bp63		CE	Burkholderia pseudomallei	Thailand	Environmental		Apichai Tuanyok, NAU, Arizona
RF85-Bp93		CE	Burkholderia pseudomallei	Thailand	Environmental		Apichai Tuanyok, NAU, Arizona
Int11-Bp1		E	Burkholderia pseudomallei	Thailand	Environmental		Apichai Tuanyok, NAU, Arizona
Int11-Bp6		E	Burkholderia pseudomallei	Thailand	Environmental		Apichai Tuanyok, NAU, Arizona
Int11-Bp7		E	Burkholderia pseudomallei	Thailand	Environmental		Apichai Tuanyok, NAU, Arizona
Int12-Bp6		E	Burkholderia pseudomallei	Thailand	Environmental		Apichai Tuanyok, NAU, Arizona
Int12-Bp60		E	Burkholderia pseudomallei	Thailand	Environmental		Apichai Tuanyok, NAU, Arizona
Int12-Bp75		E	Burkholderia pseudomallei	Thailand	Environmental		Apichai Tuanyok, NAU, Arizona
Int13-Bp178		E	Burkholderia pseudomallei	Thailand	Environmental		Apichai Tuanyok, NAU, Arizona
Int13-Bp48		E	Burkholderia pseudomallei	Thailand	Environmental		Apichai Tuanyok, NAU, Arizona
Int14-Bp1		E	Burkholderia pseudomallei	Thailand	Environmental		Apichai Tuanyok, NAU, Arizona
Int1-Bp150		E	Burkholderia pseudomallei	Thailand	Environmental		Apichai Tuanyok, NAU, Arizona
Int1-Bp19		E	Burkholderia pseudomallei	Thailand	Environmental		Apichai Tuanyok, NAU, Arizona
Int1-Bp260		E	Burkholderia pseudomallei	Thailand	Environmental		Apichai Tuanyok, NAU, Arizona
Int1-Bp99		E	Burkholderia pseudomallei	Thailand	Environmental		Apichai Tuanyok, NAU, Arizona
Int21-Bp1		E	Burkholderia pseudomallei	Thailand	Environmental		Apichai Tuanyok, NAU, Arizona
Int21-Bp11		E	Burkholderia pseudomallei	Thailand	Environmental		Apichai Tuanyok, NAU, Arizona
Int21-Bp4		E	Burkholderia pseudomallei	Thailand	Environmental		Apichai Tuanyok, NAU, Arizona
Int21-Bp7		E	Burkholderia pseudomallei	Thailand	Environmental		Apichai Tuanyok, NAU, Arizona
Int22-Bp4		E	Burkholderia pseudomallei	Thailand	Environmental		Apichai Tuanyok, NAU, Arizona
Int22-Bp51		E	Burkholderia pseudomallei	Thailand	Environmental		Apichai Tuanyok, NAU, Arizona
Int23-Bp72		E	Burkholderia pseudomallei	Thailand	Environmental		Apichai Tuanyok, NAU, Arizona
Int23-Bp81		E	Burkholderia pseudomallei	Thailand	Environmental		Apichai Tuanyok, NAU, Arizona
Int25-Bp7		E	Burkholderia pseudomallei	Thailand	Environmental		Apichai Tuanyok, NAU, Arizona
Int2-Bp130		E	Burkholderia pseudomallei	Thailand	Environmental		Apichai Tuanyok, NAU, Arizona
Int2-Bp226		E	Burkholderia pseudomallei	Thailand	Environmental		Apichai Tuanyok, NAU, Arizona
Int32-Bp6		E	Burkholderia pseudomallei	Thailand	Environmental		Apichai Tuanyok, NAU, Arizona
Int33-Bp50		E	Burkholderia pseudomallei	Thailand	Environmental		Apichai Tuanyok, NAU, Arizona
Int33-Bp62		E	Burkholderia pseudomallei	Thailand	Environmental		Apichai Tuanyok, NAU, Arizona
Int37-Bp14		E	Burkholderia pseudomallei	Thailand	Environmental		Apichai Tuanyok, NAU, Arizona
Int37-Bp18		E	Burkholderia pseudomallei	Thailand	Environmental		Apichai Tuanyok, NAU, Arizona
Int3-Bp100		E	Burkholderia pseudomallei	Thailand	Environmental		Apichai Tuanyok, NAU, Arizona
Int3-Bp171		E	Burkholderia pseudomallei	Thailand	Environmental		Apichai Tuanyok, NAU, Arizona
Int3-Bp18		E	Burkholderia pseudomallei	Thailand	Environmental		Apichai Tuanyok, NAU, Arizona
Int3-Bp68		E	Burkholderia pseudomallei	Thailand	Environmental		Apichai Tuanyok, NAU, Arizona
Int42-Bp2		E	Burkholderia pseudomallei	Thailand	Environmental		Apichai Tuanyok, NAU, Arizona
Int4-Bp18		E	Burkholderia pseudomallei	Thailand	Environmental		Apichai Tuanyok, NAU, Arizona
Int4-Bp21		E	Burkholderia pseudomallei	Thailand	Environmental		Apichai Tuanyok, NAU, Arizona
Int4-Bp27		E	Burkholderia pseudomallei	Thailand	Environmental		Apichai Tuanyok, NAU, Arizona
Int4-Bp35		E	Burkholderia pseudomallei	Thailand	Environmental		Apichai Tuanyok, NAU, Arizona
Int4-Bp47		E	Burkholderia pseudomallei	Thailand	Environmental		Apichai Tuanyok, NAU, Arizona
NRF77-Bp2		E	Burkholderia pseudomallei	Thailand	Environmental		Apichai Tuanyok, NAU, Arizona
NRF96-Bp18		E	Burkholderia pseudomallei	Thailand	Environmental		Apichai Tuanyok, NAU, Arizona
NRF96-Bp31		E	Burkholderia pseudomallei	Thailand	Environmental		Apichai Tuanyok, NAU, Arizona
NRF96-Bp39		E	Burkholderia pseudomallei	Thailand	Environmental		Apichai Tuanyok, NAU, Arizona
NRF96-Bp47		E	Burkholderia pseudomallei	Thailand	Environmental		Apichai Tuanyok, NAU, Arizona
NRF96-Bp7		E	Burkholderia pseudomallei	Thailand	Environmental		Apichai Tuanyok, NAU, Arizona
RF87-Bp10		E	Burkholderia pseudomallei	Thailand	Environmental		Apichai Tuanyok, NAU, Arizona
RF87-Bp2		E	Burkholderia pseudomallei	Thailand	Environmental		Apichai Tuanyok, NAU, Arizona
RF87-Bp3		E	Burkholderia pseudomallei	Thailand	Environmental		Apichai Tuanyok, NAU, Arizona
RF87-Bp6		E	Burkholderia pseudomallei	Thailand	Environmental		Apichai Tuanyok, NAU, Arizona
RF87-Bp8		E	Burkholderia pseudomallei	Thailand	Environmental		Apichai Tuanyok, NAU, Arizona
K96243		C	Burkholderia pseudomallei	Thailand	Clinical		Apichai Tuanyok, NAU, Arizona (DNA sample was obtained from Dr. Jonathan Warawa, Rocky Mountain Laboratory, MT, USA)
1710b		CE	Burkholderia pseudomallei	Thailand	Clinical		Sharon Peacock, Bangkok, Thailand
1106a		CE	Burkholderia pseudomallei	Thailand	Clinical		Sharon Peacock, Bangkok, Thailand
MSHR1554		B	Burkholderia thailandensis-like	Australia	Environmental	475	Bart J. Currie, Menzies School Health Research, Australia
MSMB43		B	Burkholderia thailandensis-like	Australia	Environmental		Bart J. Currie, Menzies School Health Research, Australia
Phuket 4 W-1	2002721701	A	Burkholderia thailandensis	Thailand	Environmental		Mindy Glass, CDC, Atlanta
USAMRU Malaysia #20	2002721744	A	Burkholderia thailandensis	Malaysia	Unknown		Mindy Glass, CDC, Atlanta
E0122		A	Burkholderia thailandensis	Thailand	Environmental		Sharon Peacock, Bangkok, Thailand
E0154		A	Burkholderia thailandensis	Thailand	Environmental		Sharon Peacock, Bangkok, Thailand
E0004		A	Burkholderia thailandensis	Thailand	Environmental		Sharon Peacock, Bangkok, Thailand
E0005		A	Burkholderia thailandensis	Thailand	Environmental		Sharon Peacock, Bangkok, Thailand
E0017		A	Burkholderia thailandensis	Thailand	Environmental		Sharon Peacock, Bangkok, Thailand
E0028		A	Burkholderia thailandensis	Thailand	Environmental		Sharon Peacock, Bangkok, Thailand
E0032		A	Burkholderia thailandensis	Thailand	Environmental		Sharon Peacock, Bangkok, Thailand
E0042		A	Burkholderia thailandensis	Thailand	Environmental		Sharon Peacock, Bangkok, Thailand
E0048		A	Burkholderia thailandensis	Thailand	Environmental		Sharon Peacock, Bangkok, Thailand
E0049		A	Burkholderia thailandensis	Thailand	Environmental		Sharon Peacock, Bangkok, Thailand
E0112		A	Burkholderia thailandensis	Thailand	Environmental		Sharon Peacock, Bangkok, Thailand
E0119		A	Burkholderia thailandensis	Thailand	Environmental		Sharon Peacock, Bangkok, Thailand
E0121		A	Burkholderia thailandensis	Thailand	Environmental		Sharon Peacock, Bangkok, Thailand
E0128		A	Burkholderia thailandensis	Thailand	Environmental		Sharon Peacock, Bangkok, Thailand
E0131		A	Burkholderia thailandensis	Thailand	Environmental		Sharon Peacock, Bangkok, Thailand
E0146		A	Burkholderia thailandensis	Thailand	Environmental		Sharon Peacock, Bangkok, Thailand
E0148		A	Burkholderia thailandensis	Thailand	Environmental		Sharon Peacock, Bangkok, Thailand
E0149		A	Burkholderia thailandensis	Thailand	Environmental		Sharon Peacock, Bangkok, Thailand
E0151		A	Burkholderia thailandensis	Thailand	Environmental		Sharon Peacock, Bangkok, Thailand
E0152		A	Burkholderia thailandensis	Thailand	Environmental		Sharon Peacock, Bangkok, Thailand
E0153		A	Burkholderia thailandensis	Thailand	Environmental		Sharon Peacock, Bangkok, Thailand
E0158		A	Burkholderia thailandensis	Thailand	Environmental		Sharon Peacock, Bangkok, Thailand
E0159		A	Burkholderia thailandensis	Thailand	Environmental		Sharon Peacock, Bangkok, Thailand
E0161		A	Burkholderia thailandensis	Thailand	Environmental		Sharon Peacock, Bangkok, Thailand
E0162		A	Burkholderia thailandensis	Thailand	Environmental		Sharon Peacock, Bangkok, Thailand
E0169		A	Burkholderia thailandensis	Thailand	Environmental		Sharon Peacock, Bangkok, Thailand
E0174		A	Burkholderia thailandensis	Thailand	Environmental		Sharon Peacock, Bangkok, Thailand
E0175		A	Burkholderia thailandensis	Thailand	Environmental		Sharon Peacock, Bangkok, Thailand
E0177		A	Burkholderia thailandensis	Thailand	Environmental		Sharon Peacock, Bangkok, Thailand
E0188		A	Burkholderia thailandensis	Thailand	Environmental		Sharon Peacock, Bangkok, Thailand
E0201		A	Burkholderia thailandensis	Thailand	Environmental		Sharon Peacock, Bangkok, Thailand
E0202		A	Burkholderia thailandensis	Thailand	Environmental		Sharon Peacock, Bangkok, Thailand
E0205		A	Burkholderia thailandensis	Thailand	Environmental		Sharon Peacock, Bangkok, Thailand
E0207		A	Burkholderia thailandensis	Thailand	Environmental		Sharon Peacock, Bangkok, Thailand
E0229		A	Burkholderia thailandensis	Thailand	Environmental		Sharon Peacock, Bangkok, Thailand
E0232		A	Burkholderia thailandensis	Thailand	Environmental		Sharon Peacock, Bangkok, Thailand
E0234		A	Burkholderia thailandensis	Thailand	Environmental		Sharon Peacock, Bangkok, Thailand
E0236		A	Burkholderia thailandensis	Thailand	Environmental		Sharon Peacock, Bangkok, Thailand
E0246		A	Burkholderia thailandensis	Thailand	Environmental		Sharon Peacock, Bangkok, Thailand
E0253		A	Burkholderia thailandensis	Thailand	Environmental		Sharon Peacock, Bangkok, Thailand
E0255		A	Burkholderia thailandensis	Thailand	Environmental		Sharon Peacock, Bangkok, Thailand
E0257		A	Burkholderia thailandensis	Thailand	Environmental		Sharon Peacock, Bangkok, Thailand
E0260		A	Burkholderia thailandensis	Thailand	Environmental		Sharon Peacock, Bangkok, Thailand
E0263		A	Burkholderia thailandensis	Thailand	Environmental		Sharon Peacock, Bangkok, Thailand
E0274		A	Burkholderia thailandensis	Thailand	Environmental		Sharon Peacock, Bangkok, Thailand
E0285		A	Burkholderia thailandensis	Thailand	Environmental		Sharon Peacock, Bangkok, Thailand
E0287		A	Burkholderia thailandensis	Thailand	Environmental		Sharon Peacock, Bangkok, Thailand
E0290		A	Burkholderia thailandensis	Thailand	Environmental		Sharon Peacock, Bangkok, Thailand
E0291		A	Burkholderia thailandensis	Thailand	Environmental		Sharon Peacock, Bangkok, Thailand
E0299		A	Burkholderia thailandensis	Thailand	Environmental		Sharon Peacock, Bangkok, Thailand
E0305		A	Burkholderia thailandensis	Thailand	Environmental		Sharon Peacock, Bangkok, Thailand
E0327		A	Burkholderia thailandensis	Thailand	Environmental		Sharon Peacock, Bangkok, Thailand
E0331		A	Burkholderia thailandensis	Thailand	Environmental		Sharon Peacock, Bangkok, Thailand
E0336		A	Burkholderia thailandensis	Thailand	Environmental		Sharon Peacock, Bangkok, Thailand
E0346		A	Burkholderia thailandensis	Thailand	Environmental		Sharon Peacock, Bangkok, Thailand
E0352		A	Burkholderia thailandensis	Thailand	Environmental		Sharon Peacock, Bangkok, Thailand
E0354		A	Burkholderia thailandensis	Thailand	Environmental		Sharon Peacock, Bangkok, Thailand
E0360		A	Burkholderia thailandensis	Thailand	Environmental		Sharon Peacock, Bangkok, Thailand
E0364		A	Burkholderia thailandensis	Thailand	Environmental		Sharon Peacock, Bangkok, Thailand
E0365		A	Burkholderia thailandensis	Thailand	Environmental		Sharon Peacock, Bangkok, Thailand
E0367		A	Burkholderia thailandensis	Thailand	Environmental		Sharon Peacock, Bangkok, Thailand
E0416		A	Burkholderia thailandensis	Thailand	Environmental		Sharon Peacock, Bangkok, Thailand
E0421		A	Burkholderia thailandensis	Thailand	Environmental		Sharon Peacock, Bangkok, Thailand
E0423		A	Burkholderia thailandensis	Thailand	Environmental		Sharon Peacock, Bangkok, Thailand
E0424		A	Burkholderia thailandensis	Thailand	Environmental		Sharon Peacock, Bangkok, Thailand
E0426		A	Burkholderia thailandensis	Thailand	Environmental		Sharon Peacock, Bangkok, Thailand
E0427		A	Burkholderia thailandensis	Thailand	Environmental		Sharon Peacock, Bangkok, Thailand
E0430		A	Burkholderia thailandensis	Thailand	Environmental		Sharon Peacock, Bangkok, Thailand
E0433		A	Burkholderia thailandensis	Thailand	Environmental		Sharon Peacock, Bangkok, Thailand
E0435		A	Burkholderia thailandensis	Thailand	Environmental		Sharon Peacock, Bangkok, Thailand
E0436		A	Burkholderia thailandensis	Thailand	Environmental		Sharon Peacock, Bangkok, Thailand
E0438		A	Burkholderia thailandensis	Thailand	Environmental		Sharon Peacock, Bangkok, Thailand
E0440		A	Burkholderia thailandensis	Thailand	Environmental		Sharon Peacock, Bangkok, Thailand
E0444		A	Burkholderia thailandensis	Thailand	Environmental		Sharon Peacock, Bangkok, Thailand
E0447		A	Burkholderia thailandensis	Thailand	Environmental		Sharon Peacock, Bangkok, Thailand
E264		A	Burkholderia thailandensis	Thailand	Environmental		Dr. Jeff Leid, NAU, Arizona
